# Supplementary material for: In Silico Analysis of Gene Expression Network Components Underlying Pigmentation Phenotypes in the Python Identified Evolutionarily Conserved Clusters of Transcription Factor Binding Sites
Source: PubMed Central journal article supplement (PMC5028829; doi:10.1155/2016/1286510), 2016-09-06
Supplement: 1286510.f1.pdf [file 1286510.f1.pdf]

-- Input sequences -----

>DCT 1500KB upstream region

TTACATGTAATCAGGAGGACAATCAAAGCAAGGGAAGGGAAAATGAAAATCTCAAACAATTAATTTAAAACAA  
ACTAACATAACTGAAAAGAATACCCACATATGTACACTCTAACAGTAACAACCTATAGTTATAGTACAGAACTT  
TATAAACCTTCTAGAGAATTTTGAAGGTAAATCGGAAAAGAGGAGAACGTTCTTCTGATCATTTGCCCAAGGC  
AATTGGATCAAAGATTAAGAAGGCAAGAGAGCAATCACTGAAAATAAGTTTGGCCCAAATATGTAAACAAGC  
ATGAGGTTTTAGAGAAGCTGGTCTGGTTCCCGGTGACTAATGAATTGGAAGACCTCTTAGGAACCTGGACC  
ACGACTCATAGATGGTCTGCTTCTAGAAGGCTTGAATCTTTATAATTACCAGTCTGTGAGCCATCTAACAGG  
TGGTTGATCATCTTTGCTTTAAAAGTATTTATTTTATAGTAGTAGGTATACAGTTACCATCTTAGATGCTAG  
GCAAACACAGAATTGTATTAATAAACTGATGAGCCTGGTCAGTAAAATTTCTTATTTGCTCTCTCTAAACAAC  
AGAAAACGTTCCCTCCCAAATATTTAAAATTTGCTGAATGTGGATGCTCTTAGTCTTCCAGTGATAAGTACAAT  
CTGCAAGCCTCTAAGTGAAGATCACTTTCTTTGTTGGGACATGACTGATGATGAACCGTTCCTCTTTACATCA  
CTGTATGAGACACATCATAAAAATGGAGATTCATTTTAAACACTGTAAGAGTCTTGGTATCATAGCTAGAAA  
ACAGGTGGCAGAAAATGTCATTTGAATATAACCTGAATGTAGATATCAGCTCACTATGAAGGCTACAACATGG  
TAATGTGTATTGTCTTCTGCCATGTGGTAGCTCGTGATCCTTTAAAGTTTTTCAGAGTGAATTACAATATTCAA  
CTATAGTTGCTGTGGAGGTCCATAATTTTGCAATCTCTTACAAAGCTCTCAAAGAACTTGCACCCCTCAGCC  
C  
ACAGCATGAAGTCTGAGGTCGTGGTCTCATAAAGCACTGAGCAGAAGAAAAGATAAAGCAATGGGAATCAAAG  
ACGTTTTGTCTCCCTCGTCCAGGGCTTCTCCCCCAGCATTCATGGGTTTCTTTTTGCTTGTAATGTATGTG  
CTAATCATAAGGGTTTTCAAAAAGCTAATCCTTCTAATTAGGGTTTACTGACCCCCAAATATAAAATCTCCAG  
CTACGGCCTCTTGGCAAACAACAAGAGCTAAACTGTTGCCTATTAACCACATTCAGTCTGGTAATCTTGG  
ATTAAGCAAAGACCCCTGAAGGTTAACCTAGTTGCAGTGAGGAGGAAAATTTGCTTCTCGGTGAGTTCGAAT  
GGGGCTTGCTCATCCAGCTGGAGATGGCTAATGATAATCTTTTCACTGTATCTTGCATTTAGAACCACAGGCT  
GAGCAGCAGAGTTTTGGAAGCTCTGGGAATTAGATCTTG

>TYR 1500KB upstream region

ATTGACTTCACTGTGCATCATGTTTTCTGCTAGAAAATCCCAGGTTCCCCCAAGTAAAATTTGAATAGACTGG  
ATAATGGCTTTCTATTGTATTTCCATCAGAACGTCCATGCTAAAAAATGAAACCAGTCTCTACAAGTTCCAT  
ACTGTCCTGCCAACTGCCTATTCTTGTGTAAGAGCCAGCCTTGGACATCCCAAATTTCTGAATGGAGCTGC  
TGACTAGCAGAAAAAAGGGGGGGGTCAAAGAAGCCTCTTGGTTTTGCTTTCTTCTTCACTCAATTGTTT  
GTAATCTCAAATTTCTTTCCATAGCATTGTAAGAAAACAATATATGCACATTTTGTATACATATGGAACGCTATA  
GAACTTTTTCTTATTTCCATAGTTTTTCCAGATTTCTGGTTTGCCTAGAGGTTTAAAGATGGTCTGCATGGTCAAAC  
TGATTTTGTGTCAGTTTTAATCTTCCAGTGTGTTTGTCTTGTGATATACAGTATTTGTGTCTGATTGCTGCAC  
TGCATTTCCAACGTGCTGTAAGTCAATCGAAAGCACTACGGCTGGAAGACAGACTGTCCCTTGAGATGTCAGTT  
AAAAGCATTTCAAACAGCAGGGGCTCATCAATATTTCTGAGCCCGAGACTTCAGGGAGCTGTTGCCGGTGAGAA  
TACACGCATCACAGGACCAGCATAAGTCAATTTTCAATTTCAATATGATATGATCATAGCAATATGCAAGGAAGCC  
CAGATATTCATAGTTTTCTAGCTTAAAAGTAGGCTGAACCAACAGTTCTCTGCTACGTTTGTGAGTGAAGAGAT  
CCCAATGCATTTTGTAAATATGGAACCTTACCACGCTGTAGGTGGCACTAAGACCTGAGCAGCTACGGTGTGCTGC  
AAAAGATAGAGTCATACAGCTGGAAGACCACATATCCAAGTCTGCTGAATGCAGGGATTTGTGTGAAAGC  
AGCCCAGACAGATGGCTGTGGAGCCTTTGCTTAAGCATATCAAGTCAAGGGTAGTCCACTACCTCTCTGTTTA  
G  
TTGGTTCCACTGCTGGACTATTCCTACCCTAGATGTCTTTCCTAACATTCAGGTAGAACTGCTCCTTCCCTGTA  
ATTTAAACCTGTGTTTTGCGCTTAGGAATAAGAGAGAACAGCTCTTCCATCTGACATCCATTCAGGTACTTGA  
AGAATGCTTACCTCAGTCATCTTCTCAAGACTAAGAGTACACAGCTCCTTCAACTTCTCTTACAGAAAT  
GCTTCTAGTCCCCTGATCATCGCTGTTGCTCTTCTTGAATCTTTCTTAAAGCTTGGAGCCCAGAATGGGAC  
ACAGTAAGATGGGATTTAACCAAAGCATAGTTCTTATCAGAAACCATCTCCACATCTTTACAGTCTTAGAAT  
CTCTGAATCTTACTTCTAAAATTTATATCAGGAATGCTTTGCATTAGTGCAGACCTGTAGATTTTCAATTGCTG  
CATGTACCATACAAAATTTCTTCTCTCCCTCCTCCCCAC

>AIM1 1500KB upstream region

CAGGATTTTTGAAGATACATGCATAAGACTAAACATTTTTTCAAGAAAGAGAGAAGTGGAAAGCAGACTAGAAA  
AAAATGGAATAATAGATGATAGAAAAGAAGGCAAAACCACAGTTTTGCCTGACAGACAAATCCTAGGACCTA

CAAAGACTGTGGCAGCAGCAAACATGCCCACTCCCTTTATTGGTTTCCTTCTTAATGGAATATTATTTTTATG  
CTTTTTTTAAAATGGTAGGTTGGCTTGAGTGTCAAAAAGAAAATAAATGTTAAATGTGTTTTCTGAAACCTAC  
ATGGAATTTTCAGTTTCAGATTCAACTACCCTCTGCTTAAGCATTACTCCCAAATCACAGCATATCAGGAAAAT  
CCTCTGTCAACTGCAAAGACAGAAGATGGCCCTGTGTATTATTTTTTCATCAAACATCAATATAATTTTTAAATT  
TTTGCATTTTTTGGAGCCAATGGGGAATTTTTTTCTATCATAAATTGAAAATGGAGGGGTAGCTTCTATCAGG  
GTTATAATCTGGGAAAGAAGGATTACTTTTTAAGAAGTAATTTAAAAAATTGTACCATACTTACAATTCATGAG  
TGGAATAGTTACCCCAAGATTCACTATGCTTCACTCCAATGTGCTTTTGCTATTCCCTTACTCTTTTCCTGTG  
TATACATTTTTTCAGATATGCAAAGTTTAGAATTACGTTTACAGTACAAGCTGTACATGCCTGTATAGTCAGA  
AATAAATCGCTGAGAGTTCAGTGGTGAGAAGAGTATTGCCACATGAATGGTGACCGGGTGGCCCTGTTTTGCT  
TCTGAGTCCAACTATTGGCCCATGGACTCTGTTGTTAAATACAAACATATCAGGCTTTTTGCAAAAATAAA  
AATCCCTTTAAAAAATCTCCTTTGCTTCAAAGAACTCACAGCAGAGAAGACAGTATGTCTGGACTACCTTAA  
ATGTAGCAATTTGTCTTTTTCATATGGTTTCTTATTTATTTATATATCAAATTTATATAGCCGCCAGTTCAC  
T  
CTGGGCAGGGTACAACGAAGATATAAAACAAGAGTTTCCCTGGATACTTGCAGCCCTTCCTTGCACAAACTGTT  
GATCATTTTCGTCTCCATCAGAAAGAAACAACAACCCCTTATTACTGCCTTGAATTTTATATCCTCGGATCAGTC  
GAGTCTCTCCCTTCTCGGGTAACACGCAGTATGAAGGGGAGCTGGAGTGGCAGTCAATTTTCTGCTTCAAGAC  
CACGAAGTGGCAGCCCTTTAAACGGAACAAAGGAGGGTCCCGAGCCCCGAGAGAAGTAGTTGCAGTCGCGGAA  
ATAGGAGCGAGAGATAAACTTAATAAAGGCACGAAGAGGAGACAGGCGAATTCGTGGCCGTGCTTGAAGT  
TTGTACAAGCCAAGCTGAGGAGGTGGGAAGGGTGCGGTCCGCACCGCGGTTGGAGCAGCTGACAGGGCCGGCG  
GTGCTCCCGCAGCCTTTAGGAGGCGCTTTGGTTCTCCCC

>MLANA 1500KB upstream region

ACTTCTCTTTTGTGAAAGTAAGTGACCCAATTTAGATTGGTTAAGAGGGGCATAATGGAGAGATTTAATCCA  
GTGGATTGTTATGCCCCAATTCAAATCCTCTGTGGTAATTTTAAAATAATGAAAAGGGCCATGAATTTCCCTA  
TAGTATAACCAGTTAGATCTTTAATCAAATAGTTGTTTCATCAAGTAGTTTAATTACGTTTCAGGGACTTACCC  
CTAAATGTATATCAGACTGCATCTTGAGTTCCTGAATTTGAGTTGAAGTTACCAGATTTAGATGCAAAGCTAA  
ATGTATTTTTTAATATAAGTATTTATTAATTTTATATACTGCTTCTTTTTGAAGAGGCCCTAAGTGGTGTATAT  
AATAAGTGACGGTAATATGACACCAATGCAAAATACCATGGAATACAGAACAAAAAACACCATCGGCATACA  
AAGTTCATTTATAGATATGAAAATGCTGAGAAACGTGGAGGTTGAGAGGGATTGAATGTTGTCATCTCACCCA  
TAAACAGTCACTGGGAATTCCTACCAGTACCCTCACCTACTACTCTCGCATAAGGGCATGAATTTGGTTGGAAT  
CTAATTGCTCAAAGACAAAACAGAAAGTGATAATACCAGACCTTCAATAAATCCTATCACAAACAAACCTGAAA  
AATCTAGAAGATGAAGAACACATTTTTTAGCATCTTCTCCAAAGTCTTTTCAACAAAAAAATGTAAATGATTGT  
TTCAGGAGACTGTAATGCCTGATTAATTGTGCTATTTCTTTCATATTAATACTTGAATTTGTTTTAATGTGCT  
TGTTTTCTGTTTCATTTGAGGAATATATCAACATTGTTTCGTTATGAATTAATCTGAATAGAGTTTTAAAAGA  
GCAGGATGTTGATAGTAAATTAATTTCTCACCAAAGCTTTTCTCCCAGCTATTCTTCTCCCAGTATT  
ACTCAAAGGAAAAAGGCAAGTAGGAAGACGTATTCTGGGGGCAAATGTAAGAATCATTAGAAGTTTTTTTTG  
C  
ACCCTAAATGTGAGTGCATGCACAGTTTATACCAGATTGGACAGGACTGGAGATGGGTCATAATCCTGGATCT  
TATTTTGCTTTTAGAAAAC TAGCAAATAAGCTATTGAGTTGTATAAGTAGGCACTATCTGATGACAGGTTTT  
GAATACAGAGAAAGTTCTATTGCATCTTATAATGTCTAAAAGATAAAATTGCCTCAGATTGATCTTAAATCCT  
GGTAATTTTATATAGACACATCCTTGCAGTTTTCTTGCCATAATACAGAAGTGATTTTTTTCATGTTTTCTCCCA  
GGAATTTTTTATTTCATTTTCCCAGTTTAGGTCATAGCTCTGGATTTCCCAGATGTTCCCCACAATCCTGATGA  
AATTTCTAGATCAGCCAAGGTTAGCTAAATCCCTTTTTGTTAGTATTGCCATGGATTTTCAGGAAGACTGGTC  
CTGTTTTTTTTATAATTTATTACATGTATAGTTTTAAA

>MC1R 1500KB upstream region

TATCCAAATATAAATTGCTTCTCAGCCTTTTGGCTAAGATCAAGGGTGCACGGTAGACGTAGGCCGTGACTGA  
TCCACCTGGCTCACCTTGATGGCAACGGTCAGGTGCAGCGACCACCTTCCTTGGTTTCTTCTCCATCATAAG  
TGATCACTCCGGGGTCCAACAAAGGTGGCAGTTTGGCTGCTTTGCCCTGGGTGCCTCCACATCAGTTAGCAT  
GATCTAGAGATTACGGGGCATTTGTACATCTGGACAGGCAGAAAAATTATCCCTTGATATGCCCTACAGATC  
CAATCTCAGAAGAATTTGACTACTAATCGAATAACATGCCATAATAATAAAGAAACAGACTCAGAAGTAGATG  
ATGATTCTTTCAAATTCCTCATGGCAGAGACCTTTTACCACCACCCAGTTAAAAAAAAGGGGGGGGTCAGA

AAACTGGCCGTGCTGAAGGCTAAAAGAAGGCATCCTATCAATATATGGGGTGTGTGTAGATAACTCAAGAAGT  
GATTCAGTGGCAAATGCTGAACCAGCTAATACAGGTCTCCTGTAGATAGGCCAGTTTGTACTTAAGGCTAC  
TCTGAACATAACAGGAACCATGCTGAAAGAAATATAGGAAAGGGTACTTAAAAGAACGGCATATCAGATATGG  
TTGACGCTGTCCTTGGCACAACCTGGCTCAGCAGCAGCGTGGCCCAGCACTCTCTCTGCTGCCACCCGTGGCC  
CACATTCCACCACTCCACCTTGGGAGCCCAGGTGATGATAATCCATTCTGTTTCTGGTTTTGTAGCACTTCA  
TCTTCGGGAAAGGCCATCCACTGTCAGTGTATTTACAGAGGCAAACGCATCCTGACTTTAAGGACTGTTTC  
ATAACATCTCCCTGCCTTCAAAGTGCTCGCCGCCTGACTTATCATCATGTGCATCACCCCTCTGCCCCCTGC  
AAAAGGAGGAGCTGCATCTATCCCTTTAAAAAAGGGAAAAGAAAGAGTTCTTTCTTTGCTGTAAATTTTTGCT  
A  
ATCTATTTTTGGAGGCAGAGACAAATTCAGCAATTATAACATTAGGAAGGAAGCCAAGCAGAACCTTGACATGG  
ACACACCACTTCCCAAGGAAGATGCTGGGGGATCGCTCTCCTTAGCCGCATAGGCTGAAGAACAAAGGAGACC  
TGCAGAAACCAATGACAGGGGAAGAAAGGCCAAGAAGCCACCACCTTAGGATCCTTGAACGGTATTGCGACC  
AAAGAAGTCCTTGTGGAAGCTTGTGTCTGCGCTGCTCGCTTTGCTCTCCCGGACCCTTGTGGGGAGCATGT  
GATCTCACCATCTGGGATTTTCTGGGAGGAAAAGTGCTGACAGAGGAACCTGTAGCCTACAGGTGAGTGTG  
GGACAGGCTAAAATAACCTGCATTCATCTAAAATCACTTCAGAAGAAACGCTCTTCCAAAATCTGTGTCCCC  
CCTCTTATTTCTCACTAGCAGCGCCACAAAGTGTGAG

>RAB27A 1500KB upstream region

CATTTTCTTAGAACATTATCCACGTGCATAAGAATGCGGTCACATTTTAAAGTGCCTTTTGCCGAACTTAAGT  
GCTGCCAATTAATAGGCCCTGTGAACCTCGTTTCTGCTTATGTCCTCAATCAAAGGAGCAGACCCCTCCTT  
TAGGCACTCTCCCCACTTCTGCCAAGGGCCTCTCATTTCCATGGCACAAACTCAGTCACGCTGCGCTGTGGA  
CCAGCCTTCCCTATGGTGTCTCCGTGTTGGCCCAGGTTCAAGATGCTCTTAAATAACGCGCTAAAAGGATTTTT  
TTTCTCATGCACTCTGTTCCACCATAATAGCTGAAACAAGTCTTTATTAAGGAGTCATATGATGCTGATTATA  
TCTTGATTTGTGAGTTGTACAGCAAACACAGATCTTCCCTGTTTGTGGCAGGAAAACCACAAACCGTGGTG  
CCTGTTGGAGTTCTTCTGAATTCAGTTCTCTTTAAACACTACACATGCAAGGAGATGTGGAGAATTTGGCA  
GGAAAAGAAGTGGTCCAAGGCCAATGAAAAACATCAAGTATATGGAGGAAGTTTAAATTAACGTAGTATAAG  
GAAGAACTGCTTTATTAACCTTGCCATGCACACAAGAAAAATCCTATGAATATTACCACATGGGGGGTCTAAC  
CGAATGCCCTTTGGAAGGGCGGGGGGCTGCAGGTGTCTGTCTGCCTCCCCACATGCCCTCAGCCCTGCGAGGC  
AACACCCAAGGGTTTTGGTGTCTGCAGGGGCACGGACCTGTGCAGACCAGCCAGGCGTGCAGCAGAGGCAGCTC  
GCGTGCACCTCCTTGCAACTGCAGTTGCAGTCAAGTGTCTGCGCTCTGGAGAACAGCTGTGGACCAGGATCTC  
CTGGTTTTCCGAACAGAGCAGCCCTATCACTTTACCAGCTGAAACAGACAAGAGGGTCTTGCTCCAAGGCAGCG  
AGTTGCAGGTTGGTGCCTGCCTTCTGGCATCCTCGGTCTGGATCCAGACAGGAGCCTTCGAGGTTCAAGGATCC  
T  
TTTGAAGGATGTGAATTCCTTTGCACTTTGGGGGGCTTCACACATACTCCACTCTGATGACGTATGAAAGAA  
AACACCCAAGGTGTGCAATCAAACCTGATTTAGCAAGAGAAATGGCTGTTTTAGCTGCAGGGACTGATAAACCC  
TGGGCAGCACCCTTCTACAGAAGCCGGCCATACCGTGACGGTTTTCTCGCTAATCTTTGCAGCAACAAAG  
CAAGCAACAGCAGCTCCTGATTCATCCTGCACTGTTGAGTGAATGGGCACGTTTTATCCTTGAAGTTGCCAGG  
CTACAGAAGCCTTCAGCCGGGGACAAGGCTGCTTCCAAGGACTGCCAGAGAGTTCCCTTCCCTCTTCCACGG  
TACCTCCCTGCAGCAGTGGCGGCATTCAGCCTCAGGGCCTCCCTGGTTCTCTGCCAGTCCCCCCCCCGCC  
TCCTCCCCAACACAGGAAATCCTGCTTCCAACCTGTGGGG

>MITF 1500bp upstream region

AAATGTATGTTTCATCTCAAGAAAGTCTTATATAGGTATAAGATTTATTTGGACACTGATCCCTGTTTAGATCT  
CTGTCACAACAGTGTGTTGCTTGCATTATTATTTCAAGTGAATTTCTGGAAGAAAGAACAATAAACATTA  
TAAAATAATTTCCATTTCTAATTTCCATAATGCTCTTAAAGTAACTAGATAGCTATGCTGTCTATGGTATCC  
TATGCTGACCTGTCTACCTTATCCTACCCTACCCTACCCTACCCTACCCTACCCTACCCTACCCTATCCTGG  
CTTGTCTCTGTCTATGTGTGTCTTTAGCCTAATCTACACCTTTGAAAACCTCTCTTATTTAAAATTTCT  
CTCTTAAGCACTAATACATCTAATAAATTTATTTTTCAGATACTACATAGAAGAGTCACCTTCACTGATTACATT  
TTTTTTCAATATTAATTTGTTTCCATTTTACATATTTTGATACAGTTCGCACTGTCAACCAGTAGCACCTGAC  
GTGCCCATTTCAAAAGGACTTTTAGATGCTTGAGAATAAAATGCTTCTTGTGTTGCTCGACAAAACCTTTGGC  
CCTATTGTTGTAATGCATGCAGGGTCTAGAACAAAATGCTGCAGGAGATTGTCCAGACAAAGCTGCACTACCT  
AGACATTCACCAGTTTTCTCACAAATGTTGTGACAGTAATTTCCCTGAATATAACATTCCTGTCTTGCTATA

GCAGTTCTTTACCTGAGCTGCTGGGTGACAGCCCCATTGAGCTGGAGTAGAAAATTCCCATAGAGCTGGACTA  
GGAAGTCCCATTGAACTGGATTAGAAAGTTCCCCTGAGCTCTACTAGAAAGTTCCCATTGAGTTGGACTAG  
AAGTCCCCTGAGCTGGACTAGACTGCTGAGTTCAGGTCCTCCCTTAGGCATGAAAGCCGCCTGGGTGACTT  
TGAGCCAGCTACTGTCTCTCAGCACTACTTTATAGGGTTGTTGCTGGGAAAAAAGTAGGCAGGAGCATTATGT  
A  
CACTGCCTTGAGTTGCAAAAATAAAGACAGGATATCAGTCTAATAATCAATAAATCTATAGGGACCTCTTATT  
GAGAGGGCATATATTTGATTCATTTTTCAGTATGATAACTGGGCCCTATTGGTTCCAAAATCAGGCCTTACC  
AAAAAAGAAAAGAAAAGGGAATAAAGGAATCCTGACTGAAAGAGTAGGGAATCAAAGACAACCTTCTGTCT  
CCTTTTGAATTAGTATCGTATAATCACTGGGGTGCTGATCATTAGAAAGACTAGAACATAGCTAACTTCTTGT  
GTTAAACAGAGATCAAGCCAGAAATCCATATACATCCACACCCCTGCCAGGCATTTTCTACACTTGCAAAG  
GTTTTTGCCCACTTCTAGCACATGCAATGGCCCCCTCCAAAGCCTGACTCTTTAACTCCAGCTAATATTT  
ACTGAGCAGTGATGAGTGTCTCTGGTGTTCCTCAGC

>Oa1 1500KB upstream region

TGTAGACTTCAACTCTCNNNNNNNNNNNNNNNNNNNNNNNNNNNNNNNNNNNNNNNNNNNNNNNNNNNNNNNN  
NNNNNNNNNNNNNNNNNNNNNNNNNNNNNNNNNNNNNNNNNNNNNNNNNNNNNNNNNNNNNNNNNNNNNN  
TAAAACCTAAGCAATTTAAAATTGTGTAGCCTTCAACTCTCAGAATTCGGGGGGTTGAAGTCCACACATCTTA  
AAGTTGCCAAGTTTTAAAACACTGGTCAAGGTGTAAGAAAGGGTTACTGAACCTGGGCTGCAAAAGTCCAGCA  
GACACCACTAGACAGCTGCAGCAATACAGAAAACCTCTATATCACTGCCATCATCTAGCAGTCATCTGGATTTT  
TGAGCCCAGATGTGGTATGGTAGTCCAAAGGTAATTCAGATGCACTGGATCCATGCCTTACTTTCTCTTCTCT  
TCTACTTCATCATCTTCTCAGAGACGCAATAACATCTTTGAGCAGTAATTAGTGGGCATGGGGTCCGATGAT  
CTCACCGCTCAGGCCTCTGAAGTTTTTTCAGGAGTGCCGGCACAGCTACCCGCCGGCGTGGGAAAAGCTGTTTT  
AGGGCAGTCAGGAGTTCAGGAAACAAATCTCAGAGCGGTAACAGAACCACGTGCAGGGAGGAGGATTTATGCC  
CCAGCAAGTCATGCTAAGAAAACACATAGGCACAATTGATGAGAAACGGTAATCCTCTGTCCCAATTTACAA  
AACGCGGAGGTTGACCCATGCAAGGAGTCTTTTTCAGACTGCGCCTTTTTCAGAAGTTCGGAAGAGCTGCTCCT  
TTTCTCTGGCGCGCCGCGCCCAAGAGGGTCCGATCCACCCGCTCCAGCGAGAAGCCAATTCGGTTTTGAGTG  
AAGCCCTGCCAACGCCTCGAAGCAAGGGGAATGAAAGACACGCGGTTCCGCCCCCGCTCTCCCCCGCGTCT  
CGCTGCCCTAGTACGATTTTCCCCCGCGGGGAGGAAAAAAGGANNNNNNNNNNNNNNNNNNNNNNNNNNN  
N  
NNNNNNNNNNNNNNNNNNNNNNNNNNNNNNNNNNNNNNNNNNNNNNNNNNNNNNNNNNNNNNNNNNNNNN  
NNNNNNNNNNNNNNNNNNNNNNNNNNNNNNNNNNNNNNNNNNNNNNNNNNNNNNNNNNNNNNNNNNNNNN  
NNNNNNNNNNNNNNNNNNNNNNNNNNNNNNNNNNNNNNNNNNNNNNNNNNNNNNNNNNNNNNNNNNNNNN  
NNNNNNNNNNNNNNNNNNNNNNNNNNNNNNNNNNNNNNNNNNNNNNNNNNNNNNNNNNNNNNNNNNNNNN  
NNAAACGGAGCCGGGAACGCCAGTCGGGGGCTTTAGCCGCCACTTCGCCACATGATCCGGCCGCCGCGTGACC  
CCCATCTCTAAGCCGAAGGAGGAATCTGTACAAAGGAAAGGCTGCTCGGAGCGGGAGAAAGTGCAGCGGCCCT  
CGCTCCCACCCGACCTGCCAGTCTCGCCCAAACCTTTCC

>PMEL 1500KB upstream region

TTTTGTGGATAATGATACAAACGTAATAAAGAAGAAAACCCTCATCAGGATGAGTAGCCTTCTTGCAGAACTA  
TGCCAGCTTTTGTTCCTCCCAAAGTTTTGTTATAAGGCGATACAGGAAGTCTTCATATGCTGTGGCAAAGT  
GGTTGATCTGTTTTTGGTGGTGGTTTTCCCAAATGGCTTGTAGCTGCTCATAACAGATATCCATCTGTACTTAG  
AAAATCAAGACAGCTAAACTAGTCTTAGATTGGAAGTCAAGCATATCAGTTTAGTTGAAAAGCCCCCTTTAT  
ACCCTGCAGTTTTCAGAAATTTGTAAGAGGTCATCCCTATACAACAGTGTCTTCAACCTTGGAACCTTAAAG  
ATGCGTGGACTTCAACTCCAGAATTCAGCAGCCAGCATGGCTGGCTGNNNNNNNNNNNNNNNNNNNNNNNNNN  
NNNNNNNNNNNNNNNNNNNNNNNNNNNNNNNNNNNNNNNNNNNNNNNNNNNNNNNNNNNNNNNNNNNNNN  
NNNNNNNNNNNNNNNNNNNNNNNNNNNNNNNNNNNNNNNNNNNNNNNNNNNNNNNNNNNNNNNNNNNNNN  
NNNNNNNNNNNNNNNNNNNNNNNNNNNNNNNNNNNNNNNNNNNNNNNNNNNNNNNNNNNNNNNNNNNNNN  
NNNNNNNNNNNNNNNNNNNNNNNNNNNNNNNNNNNNNNNNNNNNNNNNNNNNNNNNNNNNNNNNNNNNNN  
NNNNNNNNNNNNNNNNNNNNNNNNNNNNNNNNNNNNNNNNNNNNNNNNNNNNNNNNNNNNNNNNNNNNNN  
NNNNNNNNNNNNNNNNNNNNNNNNNNNNNNNNNNNNNNNNNNNNNNNNNNNNNNNNNNNNNNNNNNNNNN  
NNNNNNNNNNNNNNNNNNNNNNNNNNNNNNNNNNNNNNNNNNNNNNNNNNNNNNNNNNNNNNNNNNNNNN  
AAAGTTGCCAAGGTTGAGAAACACAGCTATATAATATTTGTCTTACCTACTGAATTAATCTGTGTCAAATT  
ATTTTTCTGTATTGGAGTGGGAGTGGTTGTGTGCTTAAGTGACTTTCATTCTAACAGATGGCTCACCCATCCC  
TCTGCATTCCATGACTTTGTCCAGAAATGTAGGACCACAGCAAACCCTGCCTCGCCTGCTGTCCAAGAAACCC

TAGACCATGCCCTTGCCCTGAGAATTATTTTTGATTTAAATTGTGGATTTCCTTTGCCTGCTTTGACTTGCTTCA  
T  
ATCACTATCTGCCCAGGCATCCAATTTCAAAGGAGATTTTGAAGTTACAAGAATATGAAATGGTTGCAGATAT  
TCATGCTCACTTTATATCAGCCTGTCCTGTTTCTCCTGTTCTCAGTGCTAGCACCTCTCTTTGGAAGAAGTTT  
TTCCAGAATTTGAGATGCCACCCTCGTTCCCCACTTCTAGCTCTAGAATTGCCAGGCATGCTTCTGTTTCTT  
CTCTCTCATCTCTTTCTGTAGTGTCCCTGGAGCCACCAGTACCCAGTTTGGAGCTCTGGTATATTGCTCATG  
TGCAGTGTCCATCAACGGGGCAGCTGGAAATCTATTCCCTTATGAGGTGGCCTATTGGCGCTGACCAGGTCAG  
GCAAATTTCTGGACTACCATTTCAGCTAGCAACTGGGGAATCGCCATTTGACTGCTCTTCCACACATAAATGGCT  
CACATGGTGTAGACAATGATCACACTGAGAAGTAGTCCA

-- Factors predicted by PROMO in these sequences -----

NAME; MATRIX\_WIDTH;  
POU3F2 [T00630]; 7  
USF-1 [T00875]; 7  
Mitf [T01554]; 13  
USF1 [T00874]; 9  
LEF-1 [T02905]; 8  
FOXD3 [T02290]; 8  
FOXD3 [T04166]; 11  
USF-1 [T00877]; 11  
CREB [T00989]; 10  
CREB [T00163]; 9  
CREB [T00164]; 9

-- PROMO predictions detail -----

Sequence name; Factor name; Start position; End position; Dissimilarity;  
String; RE equally; RE query  
DCT 1500KB upstream region; POU3F2 [T00630]; 41; 47; 0.000000; AAATGAA;  
0.18311; 0.21080;  
DCT 1500KB upstream region; POU3F2 [T00630]; 47; 53; 8.841973; AAATCTC;  
0.27466; 0.33169;  
DCT 1500KB upstream region; POU3F2 [T00630]; 160; 166; 5.963103;  
AGAATTT; 0.73242; 0.98415;  
DCT 1500KB upstream region; POU3F2 [T00630]; 174; 180; 8.361098;  
AAATCGG; 0.64087; 0.67044;  
DCT 1500KB upstream region; POU3F2 [T00630]; 203; 209; 5.457738;  
ATCATTT; 0.73242; 0.73821;  
DCT 1500KB upstream region; POU3F2 [T00630]; 261; 267; 5.963103;  
AAATAAG; 0.73242; 0.98415;  
DCT 1500KB upstream region; POU3F2 [T00630]; 276; 282; 7.730221;  
AAATATG; 0.91553; 1.19566;  
DCT 1500KB upstream region; POU3F2 [T00630]; 462; 468; 5.963103;  
AGTATTT; 0.73242; 0.98415;  
DCT 1500KB upstream region; POU3F2 [T00630]; 466; 472; 0.505365;  
TTTATTT; 0.54932; 0.77377;  
DCT 1500KB upstream region; POU3F2 [T00630]; 554; 560; 7.730221;  
AAAATTT; 0.91553; 1.19566;  
DCT 1500KB upstream region; POU3F2 [T00630]; 555; 561; 9.094656;  
AAATTTTC; 0.27466; 0.33169;  
DCT 1500KB upstream region; POU3F2 [T00630]; 561; 567; 5.963103;  
CTTATTT; 0.73242; 0.98415;  
DCT 1500KB upstream region; POU3F2 [T00630]; 600; 606; 7.730221;

AAATATT; 0.91553; 1.19566;  
DCT 1500KB upstream region; POU3F2 [T00630]; 601; 607; 7.730221;  
AAATATTT; 0.91553; 1.19566;  
DCT 1500KB upstream region; POU3F2 [T00630]; 608; 614; 7.730221;  
AAAATTT; 0.91553; 1.19566;  
DCT 1500KB upstream region; POU3F2 [T00630]; 609; 615; 7.730221;  
AAATTTG; 0.91553; 1.19566;  
DCT 1500KB upstream region; POU3F2 [T00630]; 750; 756; 2.650678;  
AAATGGA; 0.27466; 0.41195;  
DCT 1500KB upstream region; POU3F2 [T00630]; 759; 765; 0.000000;  
TTCATTT; 0.18311; 0.21080;  
DCT 1500KB upstream region; POU3F2 [T00630]; 815; 821; 8.589292;  
AAATGTC; 0.64087; 0.67044;  
DCT 1500KB upstream region; POU3F2 [T00630]; 819; 825; 6.822173;  
GTCATTT; 0.54932; 0.52790;  
DCT 1500KB upstream region; POU3F2 [T00630]; 970; 976; 5.963103;  
ATAATTT; 0.73242; 0.98415;  
DCT 1500KB upstream region; POU3F2 [T00630]; 1225; 1231; 2.272484;  
AAATATA; 0.27466; 0.41195;  
DCT 1500KB upstream region; POU3F2 [T00630]; 1232; 1238; 8.841973;  
AAATCTC; 0.27466; 0.33169;  
DCT 1500KB upstream region; POU3F2 [T00630]; 1362; 1368; 9.978215;  
AAATTGC; 0.18311; 0.18057;  
DCT 1500KB upstream region; POU3F2 [T00630]; 1441; 1447; 0.000000;  
TGCATTT; 0.18311; 0.21080;  
DCT 1500KB upstream region; USF-1 [T00875]; 96; 102; 5.121209; CCACATA;  
0.73242; 0.41833;  
DCT 1500KB upstream region; USF-1 [T00875]; 363; 369; 11.575332;  
CCACGAC; 1.09863; 0.59829;  
DCT 1500KB upstream region; USF-1 [T00875]; 434; 440; 0.031764; CAGGTGG;  
0.36621; 0.17808;  
DCT 1500KB upstream region; USF-1 [T00875]; 619; 625; 5.974743; AATGTGG;  
0.36621; 0.23847;  
DCT 1500KB upstream region; USF-1 [T00875]; 804; 810; 0.031764; CAGGTGG;  
0.36621; 0.17808;  
DCT 1500KB upstream region; USF-1 [T00875]; 896; 902; 0.000000; CATGTGG;  
0.36621; 0.17808;  
DCT 1500KB upstream region; USF-1 [T00875]; 957; 963; 9.731297; GCTGTGG;  
0.36621; 0.15583;  
DCT 1500KB upstream region; USF-1 [T00875]; 1021; 1027; 9.731297;  
CCACAGC; 0.36621; 0.15583;  
DCT 1500KB upstream region; USF-1 [T00875]; 1040; 1046; 11.575332;  
GTCGTGG; 1.09863; 0.59829;  
DCT 1500KB upstream region; USF-1 [T00875]; 1290; 1296; 5.974743;  
CCACATT; 0.36621; 0.23847;  
DCT 1500KB upstream region; USF-1 [T00875]; 1452; 1458; 4.610088;  
CCACAGG; 0.36621; 0.13317;  
DCT 1500KB upstream region; Mitf [T01554]; 692; 704; 13.639481;  
GGGACATGACTGA; 0.00563; 0.00244;  
DCT 1500KB upstream region; Mitf [T01554]; 891; 903; 14.563599;  
TCTGCCATGTGGT; 0.02535; 0.01042;  
DCT 1500KB upstream region; Mitf [T01554]; 1158; 1170; 2.772353;  
AATGTCATGTGCT; 0.00282; 0.00123;  
DCT 1500KB upstream region; USF1 [T00874]; 904; 912; 8.481293;

AGCTCGTGA; 0.22316; 0.08113;  
DCT 1500KB upstream region; LEF-1 [T02905]; 449; 456; 1.835267;  
CTTTGCTT; 0.13733; 0.10092;  
DCT 1500KB upstream region; LEF-1 [T02905]; 685; 692; 0.904249;  
CTTTGTTG; 0.06866; 0.06728;  
DCT 1500KB upstream region; LEF-1 [T02905]; 986; 993; 7.080257;  
TTACAAAG; 0.09155; 0.08101;  
DCT 1500KB upstream region; LEF-1 [T02905]; 995; 1002; 7.737185;  
TCTCAAAG; 0.16022; 0.10553;  
DCT 1500KB upstream region; LEF-1 [T02905]; 1088; 1095; 0.531842;  
AATCAAAG; 0.09155; 0.08561;  
DCT 1500KB upstream region; LEF-1 [T02905]; 1260; 1267; 0.904249;  
CAACAAAG; 0.06866; 0.06728;  
DCT 1500KB upstream region; LEF-1 [T02905]; 1318; 1325; 1.835267;  
AAGCAAAG; 0.13733; 0.10092;  
DCT 1500KB upstream region; FOXD3 [T02290]; 54; 61; 0.461834; AAACAATT;  
0.09155; 0.11425;  
DCT 1500KB upstream region; FOXD3 [T02290]; 67; 74; 0.833571; AAACAAAC;  
0.09155; 0.11446;  
DCT 1500KB upstream region; FOXD3 [T02290]; 284; 291; 1.875536;  
AAACAAGC; 0.22888; 0.22054;  
DCT 1500KB upstream region; FOXD3 [T02290]; 513; 520; 4.743818;  
AAACACAG; 0.13733; 0.12406;  
DCT 1500KB upstream region; FOXD3 [T02290]; 577; 584; 1.851876;  
AAACAACA; 0.22888; 0.22054;  
DCT 1500KB upstream region; FOXD3 [T02290]; 768; 775; 3.910247;  
AAACTGTG; 0.11444; 0.10419;  
DCT 1500KB upstream region; FOXD3 [T02290]; 801; 808; 5.320522;  
AAACAGGT; 0.13733; 0.10109;  
DCT 1500KB upstream region; FOXD3 [T02290]; 1257; 1264; 1.851876;  
AAACAACA; 0.22888; 0.22054;  
DCT 1500KB upstream region; FOXD3 [T02290]; 1273; 1280; 3.444986;  
AACTGTTT; 0.09155; 0.08583;  
DCT 1500KB upstream region; FOXD3 [T04166]; 114; 124; 8.459600;  
ACAGTAACAAC; 0.00429; 0.00335;  
DCT 1500KB upstream region; FOXD3 [T04166]; 1256; 1266; 14.158476;  
CAAACAACAAA; 0.09012; 0.11075;  
DCT 1500KB upstream region; USF-1 [T00877]; 895; 905; 2.080477;  
CCATGTGGTAG; 0.02003; 0.01131;  
DCT 1500KB upstream region; USF-1 [T00877]; 1162; 1172; 0.693492;  
TCATGTGCTAA; 0.01144; 0.00719;  
TYR 1500KB upstream region; POU3F2 [T00630]; 34; 40; 7.074855; AAATCCC;  
0.54932; 0.52790;  
TYR 1500KB upstream region; POU3F2 [T00630]; 57; 63; 3.156043; AAATTGA;  
0.27466; 0.33133;  
TYR 1500KB upstream region; POU3F2 [T00630]; 89; 95; 0.505365; TGTATTT;  
0.54932; 0.77377;  
TYR 1500KB upstream region; POU3F2 [T00630]; 118; 124; 0.000000;  
AAATGAA; 0.18311; 0.21080;  
TYR 1500KB upstream region; POU3F2 [T00630]; 300; 306; 5.963103;  
AAATTCT; 0.73242; 0.98415;  
TYR 1500KB upstream region; POU3F2 [T00630]; 313; 319; 5.457738;  
AGCATTT; 0.73242; 0.73821;  
TYR 1500KB upstream region; POU3F2 [T00630]; 337; 343; 7.224857;

CACATTT; 0.54932; 0.52790;  
TYR 1500KB upstream region; POU3F2 [T00630]; 374; 380; 5.963103;  
CTTATTT; 0.73242; 0.98415;  
TYR 1500KB upstream region; POU3F2 [T00630]; 437; 443; 5.710420;  
CTGATTT; 0.73242; 0.73821;  
TYR 1500KB upstream region; POU3F2 [T00630]; 486; 492; 5.963103;  
AGTATTT; 0.73242; 0.98415;  
TYR 1500KB upstream region; POU3F2 [T00630]; 511; 517; 0.000000;  
TGCATTT; 0.18311; 0.21080;  
TYR 1500KB upstream region; POU3F2 [T00630]; 587; 593; 5.457738;  
AGCATTT; 0.73242; 0.73821;  
TYR 1500KB upstream region; POU3F2 [T00630]; 612; 618; 7.730221;  
AATATTT; 0.91553; 1.19566;  
TYR 1500KB upstream region; POU3F2 [T00630]; 688; 694; 0.000000;  
TTCATTT; 0.18311; 0.21080;  
TYR 1500KB upstream region; POU3F2 [T00630]; 808; 814; 0.000000;  
TGCATTT; 0.18311; 0.21080;  
TYR 1500KB upstream region; POU3F2 [T00630]; 932; 938; 7.074855;  
GGGATTT; 0.54932; 0.52790;  
TYR 1500KB upstream region; POU3F2 [T00630]; 1093; 1099; 7.327537;  
GTAATTT; 0.91553; 1.19566;  
TYR 1500KB upstream region; POU3F2 [T00630]; 1238; 1244; 5.457738;  
AAATGCT; 0.73242; 0.73821;  
TYR 1500KB upstream region; POU3F2 [T00630]; 1325; 1331; 7.074855;  
GGGATTT; 0.54932; 0.52790;  
TYR 1500KB upstream region; POU3F2 [T00630]; 1406; 1412; 5.963103;  
AAATTAT; 0.73242; 0.98415;  
TYR 1500KB upstream region; POU3F2 [T00630]; 1444; 1450; 2.019801;  
TAGATTT; 0.18311; 0.24110;  
TYR 1500KB upstream region; POU3F2 [T00630]; 1474; 1480; 5.963103;  
AAATTCT; 0.73242; 0.98415;  
TYR 1500KB upstream region; USF-1 [T00875]; 832; 838; 11.506849;  
CCACGCT; 1.09863; 0.59829;  
TYR 1500KB upstream region; USF-1 [T00875]; 840; 846; 5.152973; TAGGTGG;  
0.73242; 0.41833;  
TYR 1500KB upstream region; USF-1 [T00875]; 904; 910; 12.460630;  
CCACCAT; 0.36621; 0.23857;  
TYR 1500KB upstream region; USF-1 [T00875]; 963; 969; 9.731297; GCTGTGG;  
0.36621; 0.15583;  
TYR 1500KB upstream region; USF-1 [T00875]; 1004; 1010; 11.607096;  
CCACTAC; 1.09863; 0.59829;  
TYR 1500KB upstream region; USF-1 [T00875]; 1029; 1035; 9.763061;  
CCACTGC; 0.36621; 0.15632;  
TYR 1500KB upstream region; USF-1 [T00875]; 1049; 1055; 6.485888;  
CCACTAG; 0.36621; 0.17813;  
TYR 1500KB upstream region; USF-1 [T00875]; 1364; 1370; 5.121209;  
CCACATC; 0.73242; 0.41833;  
TYR 1500KB upstream region; LEF-1 [T02905]; 245; 252; 7.720010;  
GGTCAAAG; 0.16022; 0.10553;  
TYR 1500KB upstream region; LEF-1 [T02905]; 973; 980; 1.835267;  
CTTTGCTT; 0.13733; 0.10092;  
TYR 1500KB upstream region; LEF-1 [T02905]; 1332; 1339; 2.021471;  
AACCAAAG; 0.13733; 0.10092;  
TYR 1500KB upstream region; LEF-1 [T02905]; 1423; 1430; 8.011275;



CTTTGCAT; 0.22888; 0.16519;  
TYR 1500KB upstream region; FOXD3 [T02290]; 17; 24; 2.060269; TCATGTTT;  
0.22888; 0.22054;  
TYR 1500KB upstream region; FOXD3 [T02290]; 284; 291; 0.461834;  
AATTGTTT; 0.09155; 0.11425;  
TYR 1500KB upstream region; FOXD3 [T02290]; 325; 332; 0.184733;  
AAACAATA; 0.09155; 0.11443;  
TYR 1500KB upstream region; FOXD3 [T02290]; 463; 470; 3.910247;  
CAGTGTTT; 0.11444; 0.10419;  
TYR 1500KB upstream region; FOXD3 [T02290]; 595; 602; 4.835029;  
AAACAGCA; 0.18311; 0.12873;  
TYR 1500KB upstream region; FOXD3 [T02290]; 1013; 1020; 4.370924;  
CTCTGTTT; 0.13733; 0.12406;  
TYR 1500KB upstream region; FOXD3 [T02290]; 1104; 1111; 4.743818;  
CTGTGTTT; 0.13733; 0.12406;  
TYR 1500KB upstream region; FOXD3 [T04166]; 473; 483; 7.969909;  
CTTGTTGATAT; 0.00572; 0.00596;  
TYR 1500KB upstream region; USF-1 [T00877]; 694; 704; 14.506027;  
TCATATGATAT; 0.10300; 0.08274;  
TYR 1500KB upstream region; CREB [T00989]; 2; 11; 14.841915; TGACTTCACT;  
0.07725; 0.03507;  
AIM1 1500KB upstream region; POU3F2 [T00630]; 1; 7; 5.710420; AGGATTT;  
0.73242; 0.73821;  
AIM1 1500KB upstream region; POU3F2 [T00630]; 31; 37; 7.224857; AACATTT;  
0.54932; 0.52790;  
AIM1 1500KB upstream region; POU3F2 [T00630]; 74; 80; 2.650678; AAATGGA;  
0.27466; 0.41195;  
AIM1 1500KB upstream region; POU3F2 [T00630]; 80; 86; 5.963103; AAATAAT;  
0.73242; 0.98415;  
AIM1 1500KB upstream region; POU3F2 [T00630]; 131; 137; 5.710420;  
AAATCCT; 0.73242; 0.73821;  
AIM1 1500KB upstream region; POU3F2 [T00630]; 207; 213; 5.963103;  
ATTATTT; 0.73242; 0.98415;  
AIM1 1500KB upstream region; POU3F2 [T00630]; 228; 234; 8.108417;  
AAATGGT; 0.18311; 0.15867;  
AIM1 1500KB upstream region; POU3F2 [T00630]; 258; 264; 0.505365;  
AAATAAA; 0.54932; 0.77377;  
AIM1 1500KB upstream region; POU3F2 [T00630]; 262; 268; 7.224857;  
AAATGTT; 0.54932; 0.52790;  
AIM1 1500KB upstream region; POU3F2 [T00630]; 269; 275; 7.224857;  
AAATGTG; 0.54932; 0.52790;  
AIM1 1500KB upstream region; POU3F2 [T00630]; 294; 300; 7.327537;  
GGAATTT; 0.91553; 1.19566;  
AIM1 1500KB upstream region; POU3F2 [T00630]; 342; 348; 7.074855;  
AAATCAC; 0.54932; 0.52790;  
AIM1 1500KB upstream region; POU3F2 [T00630]; 361; 367; 5.710420;  
AAATCCT; 0.73242; 0.73821;  
AIM1 1500KB upstream region; POU3F2 [T00630]; 402; 408; 5.963103;  
ATTATTT; 0.73242; 0.98415;  
AIM1 1500KB upstream region; POU3F2 [T00630]; 425; 431; 5.963103;  
ATAATTT; 0.73242; 0.98415;  
AIM1 1500KB upstream region; POU3F2 [T00630]; 432; 438; 2.272484;  
TAAATTT; 0.27466; 0.41195;  
AIM1 1500KB upstream region; POU3F2 [T00630]; 433; 439; 7.730221;

AAATTTT; 0.91553; 1.19566;  
AIM1 1500KB upstream region; POU3F2 [T00630]; 440; 446; 0.000000;  
TGCATTT; 0.18311; 0.21080;  
AIM1 1500KB upstream region; POU3F2 [T00630]; 460; 466; 7.327537;  
GGAATTT; 0.91553; 1.19566;  
AIM1 1500KB upstream region; POU3F2 [T00630]; 478; 484; 3.156043;  
AAATTGA; 0.27466; 0.33133;  
AIM1 1500KB upstream region; POU3F2 [T00630]; 486; 492; 2.650678;  
AAATGGA; 0.27466; 0.41195;  
AIM1 1500KB upstream region; POU3F2 [T00630]; 546; 552; 7.327537;  
GTAATTT; 0.91553; 1.19566;  
AIM1 1500KB upstream region; POU3F2 [T00630]; 556; 562; 8.613781;  
AAATTGT; 0.64087; 0.67044;  
AIM1 1500KB upstream region; POU3F2 [T00630]; 659; 665; 1.767119;  
TACATTT; 0.18311; 0.24110;  
AIM1 1500KB upstream region; POU3F2 [T00630]; 729; 735; 0.505365;  
AAATAAA; 0.54932; 0.77377;  
AIM1 1500KB upstream region; POU3F2 [T00630]; 733; 739; 9.725533;  
AAATCGC; 0.18311; 0.13544;  
AIM1 1500KB upstream region; POU3F2 [T00630]; 841; 847; 0.505365;  
AAATACA; 0.54932; 0.77377;  
AIM1 1500KB upstream region; POU3F2 [T00630]; 869; 875; 0.505365;  
AAATAAA; 0.54932; 0.77377;  
AIM1 1500KB upstream region; POU3F2 [T00630]; 875; 881; 7.074855;  
AAATCCC; 0.54932; 0.52790;  
AIM1 1500KB upstream region; POU3F2 [T00630]; 888; 894; 8.841973;  
AAATCTC; 0.27466; 0.33169;  
AIM1 1500KB upstream region; POU3F2 [T00630]; 947; 953; 1.767119;  
AAATGTA; 0.18311; 0.24110;  
AIM1 1500KB upstream region; POU3F2 [T00630]; 954; 960; 9.978215;  
GCAATTT; 0.18311; 0.18057;  
AIM1 1500KB upstream region; POU3F2 [T00630]; 979; 985; 5.963103;  
CTTATTT; 0.73242; 0.98415;  
AIM1 1500KB upstream region; POU3F2 [T00630]; 983; 989; 0.505365;  
TTTATTT; 0.54932; 0.77377;  
AIM1 1500KB upstream region; POU3F2 [T00630]; 996; 1002; 7.730221;  
CAAATTT; 0.91553; 1.19566;  
AIM1 1500KB upstream region; POU3F2 [T00630]; 997; 1003; 2.272484;  
AAATTTA; 0.27466; 0.41195;  
AIM1 1500KB upstream region; POU3F2 [T00630]; 1097; 1103; 5.457738;  
ATCATTT; 0.73242; 0.73821;  
AIM1 1500KB upstream region; POU3F2 [T00630]; 1145; 1151; 9.978215;  
GCAATTT; 0.18311; 0.18057;  
AIM1 1500KB upstream region; POU3F2 [T00630]; 1222; 1228; 3.156043;  
TCAATTT; 0.27466; 0.33133;  
AIM1 1500KB upstream region; POU3F2 [T00630]; 1313; 1319; 8.613781;  
AAATAGG; 0.64087; 0.67044;  
AIM1 1500KB upstream region; USF-1 [T00875]; 52; 58; 5.152973; GAAGTGG;  
0.73242; 0.41833;  
AIM1 1500KB upstream region; USF-1 [T00875]; 110; 116; 4.610088;  
CCACAGG; 0.36621; 0.13317;  
AIM1 1500KB upstream region; USF-1 [T00875]; 151; 157; 10.584831;  
ACTGTGG; 1.09863; 0.49365;  
AIM1 1500KB upstream region; USF-1 [T00875]; 173; 179; 10.685079;

CCACTCC; 1.09863; 0.49365;  
AIM1 1500KB upstream region; USF-1 [T00875]; 318; 324; 11.538613;  
CCACTCT; 1.09863; 0.59829;  
AIM1 1500KB upstream region; USF-1 [T00875]; 580; 586; 10.685079;  
TGAGTGG; 1.09863; 0.49365;  
AIM1 1500KB upstream region; USF-1 [T00875]; 747; 753; 9.763061;  
TCAGTGG; 0.36621; 0.15632;  
AIM1 1500KB upstream region; USF-1 [T00875]; 768; 774; 0.000000;  
CCACATG; 0.36621; 0.17808;  
AIM1 1500KB upstream region; USF-1 [T00875]; 784; 790; 5.563870;  
CGGGTGG; 0.36621; 0.13403;  
AIM1 1500KB upstream region; USF-1 [T00875]; 1212; 1218; 10.685079;  
GGAGTGG; 1.09863; 0.49365;  
AIM1 1500KB upstream region; USF-1 [T00875]; 1241; 1247; 11.575332;  
CCACGAA; 1.09863; 0.59829;  
AIM1 1500KB upstream region; USF-1 [T00875]; 1366; 1372; 11.575332;  
TTCGTGG; 1.09863; 0.59829;  
AIM1 1500KB upstream region; USF-1 [T00875]; 1407; 1413; 5.152973;  
GAGGTGG; 0.73242; 0.41833;  
AIM1 1500KB upstream region; Mitf [T01554]; 767; 779; 7.618192;  
GCCACATGAATGG; 0.00778; 0.00415;  
AIM1 1500KB upstream region; LEF-1 [T02905]; 143; 150; 7.080257;  
CTACAAAG; 0.09155; 0.08101;  
AIM1 1500KB upstream region; LEF-1 [T02905]; 375; 382; 8.011275;  
CTGCAAAG; 0.22888; 0.16519;  
AIM1 1500KB upstream region; LEF-1 [T02905]; 673; 680; 8.011275;  
ATGCAAAG; 0.22888; 0.16519;  
AIM1 1500KB upstream region; LEF-1 [T02905]; 895; 902; 1.835267;  
CTTTGCTT; 0.13733; 0.10092;  
AIM1 1500KB upstream region; LEF-1 [T02905]; 900; 907; 6.707850;  
CTTCAAAG; 0.09155; 0.08561;  
AIM1 1500KB upstream region; LEF-1 [T02905]; 1266; 1273; 0.372407;  
GAACAAAG; 0.09155; 0.08561;  
AIM1 1500KB upstream region; LEF-1 [T02905]; 1486; 1493; 2.021471;  
CTTTGGTT; 0.13733; 0.10092;  
AIM1 1500KB upstream region; FOXD3 [T02290]; 30; 37; 0.461834; AACATTT;  
0.09155; 0.11425;  
AIM1 1500KB upstream region; FOXD3 [T02290]; 165; 172; 1.875536;  
AAACATGC; 0.22888; 0.22054;  
AIM1 1500KB upstream region; FOXD3 [T02290]; 271; 278; 4.651452;  
ATGTGTTT; 0.13733; 0.12406;  
AIM1 1500KB upstream region; FOXD3 [T02290]; 415; 422; 1.851876;  
AAACATCA; 0.22888; 0.22054;  
AIM1 1500KB upstream region; FOXD3 [T02290]; 791; 798; 4.858688;  
GCCTGTTT; 0.18311; 0.12873;  
AIM1 1500KB upstream region; FOXD3 [T02290]; 847; 854; 1.295405;  
AAACATAT; 0.13733; 0.15122;  
AIM1 1500KB upstream region; FOXD3 [T02290]; 1048; 1055; 2.060269;  
AAACAAGA; 0.22888; 0.22054;  
AIM1 1500KB upstream region; FOXD3 [T02290]; 1120; 1127; 1.851876;  
AAACAACA; 0.22888; 0.22054;  
AIM1 1500KB upstream region; FOXD3 [T04166]; 868; 878; 13.371894;  
AAAATAAAAAT; 0.06008; 0.08496;  
AIM1 1500KB upstream region; FOXD3 [T04166]; 958; 968; 13.371894;

TTTGTCTTTTT; 0.06008; 0.08496;  
AIM1 1500KB upstream region; FOXD3 [T04166]; 979; 989; 14.158476;  
CTTATTTATTT; 0.09012; 0.11075;  
AIM1 1500KB upstream region; FOXD3 [T04166]; 1093; 1103; 14.945058;  
GTTGATCATTT; 0.06008; 0.06359;  
AIM1 1500KB upstream region; FOXD3 [T04166]; 1116; 1126; 3.932910;  
AAAGAAACAAC; 0.00286; 0.00342;  
AIM1 1500KB upstream region; FOXD3 [T04166]; 1119; 1129; 14.158476;  
GAAACAACAAC; 0.09012; 0.11075;  
AIM1 1500KB upstream region; USF-1 [T00877]; 765; 775; 0.000000;  
TTGCCACATGA; 0.00572; 0.00447;  
MLANA 1500KB upstream region; POU3F2 [T00630]; 27; 33; 8.613781;  
CCAATTT; 0.64087; 0.67044;  
MLANA 1500KB upstream region; POU3F2 [T00630]; 60; 66; 8.841973;  
GAGATTT; 0.27466; 0.33169;  
MLANA 1500KB upstream region; POU3F2 [T00630]; 96; 102; 5.710420;  
AAATCCT; 0.73242; 0.73821;  
MLANA 1500KB upstream region; POU3F2 [T00630]; 108; 114; 7.327537;  
GTAATTT; 0.91553; 1.19566;  
MLANA 1500KB upstream region; POU3F2 [T00630]; 117; 123; 5.963103;  
AAATAAT; 0.73242; 0.98415;  
MLANA 1500KB upstream region; POU3F2 [T00630]; 135; 141; 0.505365;  
TGAATTT; 0.54932; 0.77377;  
MLANA 1500KB upstream region; POU3F2 [T00630]; 172; 178; 8.613781;  
AAATAGT; 0.64087; 0.67044;  
MLANA 1500KB upstream region; POU3F2 [T00630]; 221; 227; 1.767119;  
AAATGTA; 0.18311; 0.24110;  
MLANA 1500KB upstream region; POU3F2 [T00630]; 251; 257; 0.505365;  
TGAATTT; 0.54932; 0.77377;  
MLANA 1500KB upstream region; POU3F2 [T00630]; 271; 277; 7.477539;  
CAGATTT; 0.91553; 1.19566;  
MLANA 1500KB upstream region; POU3F2 [T00630]; 290; 296; 1.767119;  
AAATGTA; 0.18311; 0.24110;  
MLANA 1500KB upstream region; POU3F2 [T00630]; 293; 299; 0.505365;  
TGTATTT; 0.54932; 0.77377;  
MLANA 1500KB upstream region; POU3F2 [T00630]; 308; 314; 5.963103;  
AGTATTT; 0.73242; 0.98415;  
MLANA 1500KB upstream region; POU3F2 [T00630]; 317; 323; 2.272484;  
TAAATTT; 0.27466; 0.41195;  
MLANA 1500KB upstream region; POU3F2 [T00630]; 318; 324; 2.272484;  
AAATTTA; 0.27466; 0.41195;  
MLANA 1500KB upstream region; POU3F2 [T00630]; 395; 401; 7.327537;  
AAATACC; 0.91553; 1.19566;  
MLANA 1500KB upstream region; POU3F2 [T00630]; 441; 447; 0.000000;  
TTCATTT; 0.18311; 0.21080;  
MLANA 1500KB upstream region; POU3F2 [T00630]; 458; 464; 5.457738;  
AAATGCT; 0.73242; 0.73821;  
MLANA 1500KB upstream region; POU3F2 [T00630]; 631; 637; 5.710420;  
AAATCCT; 0.73242; 0.73821;  
MLANA 1500KB upstream region; POU3F2 [T00630]; 656; 662; 2.019801;  
AAATCTA; 0.18311; 0.24110;  
MLANA 1500KB upstream region; POU3F2 [T00630]; 675; 681; 7.224857;  
CACATTT; 0.54932; 0.52790;  
MLANA 1500KB upstream region; POU3F2 [T00630]; 714; 720; 1.767119;

AAATGTA; 0.18311; 0.24110;  
MLANA 1500KB upstream region; POU3F2 [T00630]; 720; 726; 5.457738;  
AAATGAT; 0.73242; 0.73821;  
MLANA 1500KB upstream region; POU3F2 [T00630]; 760; 766; 9.978215;  
GCTATTT; 0.18311; 0.18057;  
MLANA 1500KB upstream region; POU3F2 [T00630]; 813; 819; 0.000000;  
TTCATTT; 0.18311; 0.21080;  
MLANA 1500KB upstream region; POU3F2 [T00630]; 892; 898; 7.327537;  
AAATTAC; 0.91553; 1.19566;  
MLANA 1500KB upstream region; POU3F2 [T00630]; 899; 905; 0.505365;  
TTAATTT; 0.54932; 0.77377;  
MLANA 1500KB upstream region; POU3F2 [T00630]; 993; 999; 1.767119;  
AAATGTA; 0.18311; 0.24110;  
MLANA 1500KB upstream region; POU3F2 [T00630]; 1028; 1034; 7.224857;  
AAATGTG; 0.54932; 0.52790;  
MLANA 1500KB upstream region; POU3F2 [T00630]; 1094; 1100; 5.963103;  
CTTATTT; 0.73242; 0.98415;  
MLANA 1500KB upstream region; POU3F2 [T00630]; 1120; 1126; 5.963103;  
AAATAAG; 0.73242; 0.98415;  
MLANA 1500KB upstream region; POU3F2 [T00630]; 1214; 1220; 9.978215;  
AAATTGC; 0.18311; 0.18057;  
MLANA 1500KB upstream region; POU3F2 [T00630]; 1235; 1241; 5.710420;  
AAATCCT; 0.73242; 0.73821;  
MLANA 1500KB upstream region; POU3F2 [T00630]; 1243; 1249; 7.327537;  
GTAATTT; 0.91553; 1.19566;  
MLANA 1500KB upstream region; POU3F2 [T00630]; 1291; 1297; 7.074855;  
GTGATTT; 0.54932; 0.52790;  
MLANA 1500KB upstream region; POU3F2 [T00630]; 1315; 1321; 7.327537;  
GGAATTT; 0.91553; 1.19566;  
MLANA 1500KB upstream region; POU3F2 [T00630]; 1326; 1332; 0.000000;  
TTCATTT; 0.18311; 0.21080;  
MLANA 1500KB upstream region; POU3F2 [T00630]; 1354; 1360; 0.252682;  
TGGATTT; 0.54932; 0.77377;  
MLANA 1500KB upstream region; POU3F2 [T00630]; 1386; 1392; 9.094656;  
GAAATTT; 0.27466; 0.33169;  
MLANA 1500KB upstream region; POU3F2 [T00630]; 1387; 1393; 9.094656;  
AAATTTTC; 0.27466; 0.33169;  
MLANA 1500KB upstream region; POU3F2 [T00630]; 1414; 1420; 7.074855;  
AAATCCC; 0.54932; 0.52790;  
MLANA 1500KB upstream region; POU3F2 [T00630]; 1440; 1446; 0.252682;  
TGGATTT; 0.54932; 0.77377;  
MLANA 1500KB upstream region; POU3F2 [T00630]; 1473; 1479; 7.730221;  
AATATTT; 0.91553; 1.19566;  
MLANA 1500KB upstream region; USF-1 [T00875]; 70; 76; 4.641852; CCAAGTGG;  
0.36621; 0.13317;  
MLANA 1500KB upstream region; USF-1 [T00875]; 102; 108; 9.731297;  
TCTGTGG; 0.36621; 0.15583;  
MLANA 1500KB upstream region; USF-1 [T00875]; 351; 357; 5.152973;  
TAAGTGG; 0.73242; 0.41833;  
MLANA 1500KB upstream region; USF-1 [T00875]; 469; 475; 5.974743;  
AACGTGG; 0.36621; 0.23847;  
MLANA 1500KB upstream region; USF-1 [T00875]; 1373; 1379; 12.428866;  
CCACAAT; 0.36621; 0.23857;  
MLANA 1500KB upstream region; LEF-1 [T02905]; 280; 287; 8.011275;

ATGCAAAG; 0.22888; 0.16519;  
MLANA 1500KB upstream region; LEF-1 [T02905]; 433; 440; 7.080257;  
ATACAAAG; 0.09155; 0.08101;  
MLANA 1500KB upstream region; LEF-1 [T02905]; 590; 597; 7.205343;  
GCTCAAAG; 0.09155; 0.08101;  
MLANA 1500KB upstream region; LEF-1 [T02905]; 692; 699; 8.197478;  
CTCCAAAG; 0.22888; 0.16519;  
MLANA 1500KB upstream region; LEF-1 [T02905]; 909; 916; 2.021471;  
CACCAAAG; 0.13733; 0.10092;  
MLANA 1500KB upstream region; LEF-1 [T02905]; 950; 957; 8.197478;  
CTCCAAAG; 0.22888; 0.16519;  
MLANA 1500KB upstream region; FOXD3 [T02290]; 420; 427; 5.207923;  
AAACACCA; 0.18311; 0.12873;  
MLANA 1500KB upstream region; FOXD3 [T02290]; 512; 519; 2.983153;  
AAACAGTC; 0.04578; 0.04281;  
MLANA 1500KB upstream region; FOXD3 [T02290]; 600; 607; 4.001457;  
AAACAGAA; 0.11444; 0.10419;  
MLANA 1500KB upstream region; FOXD3 [T02290]; 724; 731; 0.000000;  
GATTGTTT; 0.09155; 0.11443;  
MLANA 1500KB upstream region; FOXD3 [T02290]; 785; 792; 0.461834;  
AATTGTTT; 0.09155; 0.11425;  
MLANA 1500KB upstream region; FOXD3 [T02290]; 800; 807; 1.875536;  
GCTTGTTT; 0.22888; 0.22054;  
MLANA 1500KB upstream region; FOXD3 [T02290]; 807; 814; 4.001457;  
TTCTGTTT; 0.11444; 0.10419;  
MLANA 1500KB upstream region; FOXD3 [T02290]; 834; 841; 0.554200;  
CATTGTTT; 0.09155; 0.11425;  
MLANA 1500KB upstream region; FOXD3 [T02290]; 1300; 1307; 0.554200;  
CATTGTTT; 0.09155; 0.11425;  
MLANA 1500KB upstream region; FOXD3 [T02290]; 1460; 1467; 2.429736;  
CCTTGTTT; 0.09155; 0.08561;  
MLANA 1500KB upstream region; FOXD3 [T04166]; 416; 426; 13.371894;  
AAAAAACACC; 0.06008; 0.08496;  
MLANA 1500KB upstream region; FOXD3 [T04166]; 1322; 1332; 14.945058;  
TTTATTCATTT; 0.06008; 0.06359;  
MLANA 1500KB upstream region; FOXD3 [T04166]; 1424; 1434; 10.329655;  
TTTGTTAGTAT; 0.00858; 0.00778;  
MLANA 1500KB upstream region; FOXD3 [T04166]; 1461; 1471; 14.158476;  
CTTGTTTTTTTA; 0.09012; 0.11075;  
MLANA 1500KB upstream region; USF-1 [T00877]; 1478; 1488; 14.506027;  
TTATTACATGT; 0.10300; 0.08274;  
MC1R 1500KB upstream region; POU3F2 [T00630]; 5; 11; 2.272484; AAATATA;  
0.27466; 0.41195;  
MC1R 1500KB upstream region; POU3F2 [T00630]; 11; 17; 9.978215; AAATTGC;  
0.18311; 0.18057;  
MC1R 1500KB upstream region; POU3F2 [T00630]; 235; 241; 6.822173;  
GGCATTT; 0.54932; 0.52790;  
MC1R 1500KB upstream region; POU3F2 [T00630]; 262; 268; 5.963103;  
AAATTAT; 0.73242; 0.98415;  
MC1R 1500KB upstream region; POU3F2 [T00630]; 302; 308; 5.963103;  
AGAATTT; 0.73242; 0.98415;  
MC1R 1500KB upstream region; POU3F2 [T00630]; 376; 382; 7.327537;  
AAATTCC; 0.91553; 1.19566;  
MC1R 1500KB upstream region; POU3F2 [T00630]; 522; 528; 5.457738;

AAATGCT; 0.73242; 0.73821;  
MC1R 1500KB upstream region; POU3F2 [T00630]; 613; 619; 2.272484;  
AAATATA; 0.27466; 0.41195;  
MC1R 1500KB upstream region; POU3F2 [T00630]; 831; 837; 0.505365;  
TGTATTT; 0.54932; 0.77377;  
MC1R 1500KB upstream region; POU3F2 [T00630]; 1010; 1016; 2.272484;  
TAAATTT; 0.27466; 0.41195;  
MC1R 1500KB upstream region; POU3F2 [T00630]; 1011; 1017; 7.730221;  
AAATTTT; 0.91553; 1.19566;  
MC1R 1500KB upstream region; POU3F2 [T00630]; 1024; 1030; 3.156043;  
TCTATTT; 0.27466; 0.33133;  
MC1R 1500KB upstream region; POU3F2 [T00630]; 1044; 1050; 0.505365;  
AAATTCA; 0.54932; 0.77377;  
MC1R 1500KB upstream region; POU3F2 [T00630]; 1328; 1334; 7.074855;  
GGGATTT; 0.54932; 0.52790;  
MC1R 1500KB upstream region; POU3F2 [T00630]; 1399; 1405; 7.327537;  
AAATACC; 0.91553; 1.19566;  
MC1R 1500KB upstream region; POU3F2 [T00630]; 1418; 1424; 7.074855;  
AAATCAC; 0.54932; 0.52790;  
MC1R 1500KB upstream region; POU3F2 [T00630]; 1446; 1452; 7.477539;  
AAATCTG; 0.91553; 1.19566;  
MC1R 1500KB upstream region; POU3F2 [T00630]; 1464; 1470; 5.963103;  
CTTATTT; 0.73242; 0.98415;  
MC1R 1500KB upstream region; USF-1 [T00875]; 74; 80; 0.031764; CCACCTG;  
0.36621; 0.17808;  
MC1R 1500KB upstream region; USF-1 [T00875]; 114; 120; 6.006507;  
CCACCTT; 0.36621; 0.23847;  
MC1R 1500KB upstream region; USF-1 [T00875]; 168; 174; 6.006507;  
AAGGTGG; 0.36621; 0.23847;  
MC1R 1500KB upstream region; USF-1 [T00875]; 203; 209; 5.121209;  
CCACATC; 0.73242; 0.41833;  
MC1R 1500KB upstream region; USF-1 [T00875]; 402; 408; 11.607096;  
CCACCAC; 1.09863; 0.59829;  
MC1R 1500KB upstream region; USF-1 [T00875]; 405; 411; 10.685079;  
CCACCCA; 1.09863; 0.49365;  
MC1R 1500KB upstream region; USF-1 [T00875]; 514; 520; 9.763061;  
TCAGTGG; 0.36621; 0.15632;  
MC1R 1500KB upstream region; USF-1 [T00875]; 692; 698; 11.506849;  
AGCGTGG; 1.09863; 0.59829;  
MC1R 1500KB upstream region; USF-1 [T00875]; 718; 724; 5.563870;  
CCACCCG; 0.36621; 0.13403;  
MC1R 1500KB upstream region; USF-1 [T00875]; 721; 727; 4.610088;  
CCCGTGG; 0.36621; 0.13317;  
MC1R 1500KB upstream region; USF-1 [T00875]; 729; 735; 5.974743;  
CCACATT; 0.36621; 0.23847;  
MC1R 1500KB upstream region; USF-1 [T00875]; 736; 742; 11.607096;  
CCACCAC; 1.09863; 0.59829;  
MC1R 1500KB upstream region; USF-1 [T00875]; 739; 745; 10.685079;  
CCACTCC; 1.09863; 0.49365;  
MC1R 1500KB upstream region; USF-1 [T00875]; 744; 750; 6.006507;  
CCACCTT; 0.36621; 0.23847;  
MC1R 1500KB upstream region; USF-1 [T00875]; 821; 827; 10.616595;  
CCACTGT; 1.09863; 0.49365;  
MC1R 1500KB upstream region; USF-1 [T00875]; 1101; 1107; 5.152973;

CCACTTC; 0.73242; 0.41833;  
MC1R 1500KB upstream region; USF-1 [T00875]; 1206; 1212; 11.607096;  
CCACCAC; 1.09863; 0.59829;  
MC1R 1500KB upstream region; USF-1 [T00875]; 1209; 1215; 6.006507;  
CCACTTT; 0.36621; 0.23847;  
MC1R 1500KB upstream region; USF-1 [T00875]; 1251; 1257; 6.454123;  
CTTGTGG; 0.36621; 0.17813;  
MC1R 1500KB upstream region; USF-1 [T00875]; 1484; 1490; 11.575332;  
CCACAAA; 1.09863; 0.59829;  
MC1R 1500KB upstream region; Mitf [T01554]; 917; 929; 7.123746;  
ATCATCATGTGCA; 0.00595; 0.00327;  
MC1R 1500KB upstream region; USF1 [T00874]; 719; 727; 8.313905;  
CACCCGTGG; 0.22316; 0.08113;  
MC1R 1500KB upstream region; LEF-1 [T02905]; 163; 170; 0.904249;  
CAACAAAG; 0.06866; 0.06728;  
MC1R 1500KB upstream region; LEF-1 [T02905]; 186; 193; 9.023435;  
CTTTGCC; 0.18311; 0.09642;  
MC1R 1500KB upstream region; LEF-1 [T02905]; 892; 899; 6.707850;  
TTTCAAAG; 0.09155; 0.08561;  
MC1R 1500KB upstream region; LEF-1 [T02905]; 1002; 1009; 1.835267;  
CTTTGCTG; 0.13733; 0.10092;  
MC1R 1500KB upstream region; LEF-1 [T02905]; 1085; 1092; 8.251852;  
CTTTGACA; 0.18311; 0.12147;  
MC1R 1500KB upstream region; LEF-1 [T02905]; 1155; 1162; 0.372407;  
GAACAAAG; 0.09155; 0.08561;  
MC1R 1500KB upstream region; LEF-1 [T02905]; 1238; 1245; 1.489628;  
GACCAAAG; 0.04578; 0.02752;  
MC1R 1500KB upstream region; LEF-1 [T02905]; 1280; 1287; 1.303425;  
CTTTGCTC; 0.04578; 0.02752;  
MC1R 1500KB upstream region; LEF-1 [T02905]; 1297; 1304; 0.904249;  
CTTTGTTG; 0.06866; 0.06728;  
MC1R 1500KB upstream region; LEF-1 [T02905]; 1484; 1491; 8.109591;  
CCACAAAG; 0.22888; 0.16519;  
MC1R 1500KB upstream region; FOXD3 [T02290]; 344; 351; 3.816724;  
AAACAGAC; 0.11444; 0.10419;  
MC1R 1500KB upstream region; FOXD3 [T02290]; 776; 783; 5.043422;  
TCCTGTTT; 0.18311; 0.12873;  
MC1R 1500KB upstream region; FOXD3 [T02290]; 867; 874; 2.983153;  
GACTGTTT; 0.04578; 0.04281;  
MC1R 1500KB upstream region; FOXD3 [T02290]; 1379; 1386; 3.356047;  
GAGTGTTT; 0.09155; 0.08583;  
MC1R 1500KB upstream region; FOXD3 [T02290]; 1489; 1496; 3.817880;  
AAGTGTTT; 0.11444; 0.10419;  
MC1R 1500KB upstream region; USF-1 [T00877]; 921; 931; 9.029386;  
TCATGTGCATC; 0.05007; 0.02443;  
MC1R 1500KB upstream region; USF-1 [T00877]; 1309; 1319; 8.109390;  
GCATGTGATCT; 0.02289; 0.01079;  
RAB27A 1500KB upstream region; POU3F2 [T00630]; 40; 46; 7.224857;  
CACATTT; 0.54932; 0.52790;  
RAB27A 1500KB upstream region; POU3F2 [T00630]; 177; 183; 5.457738;  
CTCATTT; 0.73242; 0.73821;  
RAB27A 1500KB upstream region; POU3F2 [T00630]; 268; 274; 7.327537;  
AAATAAC; 0.91553; 1.19566;  
RAB27A 1500KB upstream region; POU3F2 [T00630]; 283; 289; 5.710420;



AGGATTT; 0.73242; 0.73821;  
RAB27A 1500KB upstream region; POU3F2 [T00630]; 367; 373; 0.252682;  
TTGATTT; 0.54932; 0.77377;  
RAB27A 1500KB upstream region; POU3F2 [T00630]; 500; 506; 5.963103;  
AGAATTT; 0.73242; 0.98415;  
RAB27A 1500KB upstream region; POU3F2 [T00630]; 621; 627; 7.327537;  
AAATTCC; 0.91553; 1.19566;  
RAB27A 1500KB upstream region; POU3F2 [T00630]; 1119; 1125; 5.710420;  
CTGATTT; 0.73242; 0.73821;  
RAB27A 1500KB upstream region; POU3F2 [T00630]; 1134; 1140; 9.472851;  
AAATGGC; 0.18311; 0.13544;  
RAB27A 1500KB upstream region; POU3F2 [T00630]; 1477; 1483; 5.710420;  
AAATCCT; 0.73242; 0.73821;  
RAB27A 1500KB upstream region; USF-1 [T00875]; 19; 25; 0.000000;  
CCACGTG; 0.36621; 0.17808;  
RAB27A 1500KB upstream region; USF-1 [T00875]; 158; 164; 5.152973;  
CCACTTC; 0.73242; 0.41833;  
RAB27A 1500KB upstream region; USF-1 [T00875]; 211; 217; 9.731297;  
GCTGTGG; 0.36621; 0.15583;  
RAB27A 1500KB upstream region; USF-1 [T00875]; 310; 316; 12.460630;  
CCACCAT; 0.36621; 0.23857;  
RAB27A 1500KB upstream region; USF-1 [T00875]; 392; 398; 9.731297;  
CCACAGA; 0.36621; 0.15583;  
RAB27A 1500KB upstream region; USF-1 [T00875]; 408; 414; 11.575332;  
TTTGTGG; 1.09863; 0.59829;  
RAB27A 1500KB upstream region; USF-1 [T00875]; 423; 429; 11.575332;  
CCACAAA; 1.09863; 0.59829;  
RAB27A 1500KB upstream region; USF-1 [T00875]; 429; 435; 10.584831;  
ACCGTGG; 1.09863; 0.49365;  
RAB27A 1500KB upstream region; USF-1 [T00875]; 493; 499; 5.121209;  
GATGTGG; 0.73242; 0.41833;  
RAB27A 1500KB upstream region; USF-1 [T00875]; 517; 523; 5.152973;  
GAAGTGG; 0.73242; 0.41833;  
RAB27A 1500KB upstream region; USF-1 [T00875]; 639; 645; 0.000000;  
CCACATG; 0.36621; 0.17808;  
RAB27A 1500KB upstream region; USF-1 [T00875]; 705; 711; 0.000000;  
CCACATG; 0.36621; 0.17808;  
RAB27A 1500KB upstream region; USF-1 [T00875]; 858; 864; 9.731297;  
GCTGTGG; 0.36621; 0.15583;  
RAB27A 1500KB upstream region; USF-1 [T00875]; 1072; 1078; 11.538613;  
CCACTCT; 1.09863; 0.59829;  
RAB27A 1500KB upstream region; USF-1 [T00875]; 1178; 1184; 5.152973;  
CCACTTC; 0.73242; 0.41833;  
RAB27A 1500KB upstream region; USF-1 [T00875]; 1382; 1388; 10.584831;  
CCACGGT; 1.09863; 0.49365;  
RAB27A 1500KB upstream region; USF-1 [T00875]; 1400; 1406; 9.763061;  
GCAGTGG; 0.36621; 0.15632;  
RAB27A 1500KB upstream region; USF-1 [T00875]; 1491; 1497; 10.584831;  
ACTGTGG; 1.09863; 0.49365;  
RAB27A 1500KB upstream region; USF1 [T00874]; 18; 26; 2.334845;  
TCCACGTGC; 0.06294; 0.02694;  
RAB27A 1500KB upstream region; USF1 [T00874]; 19; 27; 2.100004;  
CCACGTGCA; 0.07439; 0.03130;  
RAB27A 1500KB upstream region; USF1 [T00874]; 800; 808; 8.514439;

CTCGCGTGC; 0.22316; 0.08113;  
RAB27A 1500KB upstream region; LEF-1 [T02905]; 665; 672; 8.197478;  
CTTTGGAA; 0.22888; 0.16519;  
RAB27A 1500KB upstream region; LEF-1 [T02905]; 1042; 1049; 7.479433;  
CTTTGCAC; 0.16022; 0.10553;  
RAB27A 1500KB upstream region; LEF-1 [T02905]; 1049; 1056; 9.226813;  
CTTTGGGG; 0.18311; 0.09642;  
RAB27A 1500KB upstream region; LEF-1 [T02905]; 1226; 1233; 8.011275;  
CTTTGCAG; 0.22888; 0.16519;  
RAB27A 1500KB upstream region; LEF-1 [T02905]; 1234; 1241; 0.904249;  
CAACAAAG; 0.06866; 0.06728;  
RAB27A 1500KB upstream region; FOXD3 [T02290]; 325; 332; 2.337369;  
AAACAAGT; 0.09155; 0.08561;  
RAB27A 1500KB upstream region; FOXD3 [T02290]; 403; 410; 5.412889;  
CCCTGTTT; 0.13733; 0.10109;  
RAB27A 1500KB upstream region; FOXD3 [T02290]; 473; 480; 3.540780;  
AAACACTA; 0.09155; 0.08583;  
RAB27A 1500KB upstream region; FOXD3 [T02290]; 540; 547; 1.851876;  
AAACATCA; 0.22888; 0.22054;  
RAB27A 1500KB upstream region; FOXD3 [T02290]; 916; 923; 3.816724;  
AAACAGAC; 0.11444; 0.10419;  
RAB27A 1500KB upstream region; FOXD3 [T02290]; 1095; 1102; 5.023189;  
AAACACCC; 0.18311; 0.12873;  
RAB27A 1500KB upstream region; FOXD3 [T02290]; 1138; 1145; 4.650295;  
GGCTGTTT; 0.13733; 0.12406;  
RAB27A 1500KB upstream region; FOXD3 [T04166]; 419; 429; 14.158476;  
AAAACCACAAA; 0.09012; 0.11075;  
RAB27A 1500KB upstream region; FOXD3 [T04166]; 539; 549; 14.945058;  
AAAACATCAAG; 0.06008; 0.06359;  
RAB27A 1500KB upstream region; USF-1 [T00877]; 477; 487; 10.883360;  
ACTACACATGC; 0.02038; 0.00808;  
RAB27A 1500KB upstream region; USF-1 [T00877]; 636; 646; 1.386985;  
TTACCACATGG; 0.02003; 0.01279;  
RAB27A 1500KB upstream region; USF-1 [T00877]; 702; 712; 8.802883;  
TCCCACATGC; 0.05007; 0.02443;  
RAB27A 1500KB upstream region; CREB [T00989]; 1081; 1090; 9.084806;  
TGACGTATGA; 0.05150; 0.03637;  
RAB27A 1500KB upstream region; CREB [T00163]; 1081; 1089; 1.509908;  
TGACGTATG; 0.06866; 0.04350;  
RAB27A 1500KB upstream region; CREB [T00164]; 1081; 1089; 4.825740;  
TGACGTATG; 0.08583; 0.05598;  
MITF 1500bp upstream region; POU3F2 [T00630]; 0; 6; 1.767119; AAATGTA;  
0.18311; 0.24110;  
MITF 1500bp upstream region; POU3F2 [T00630]; 38; 44; 7.477539; AAGATTT;  
0.91553; 1.19566;  
MITF 1500bp upstream region; POU3F2 [T00630]; 42; 48; 0.505365; TTTATTT;  
0.54932; 0.77377;  
MITF 1500bp upstream region; POU3F2 [T00630]; 102; 108; 5.963103;  
ATTATTT; 0.73242; 0.98415;  
MITF 1500bp upstream region; POU3F2 [T00630]; 113; 119; 7.327537;  
GGAATTT; 0.91553; 1.19566;  
MITF 1500bp upstream region; POU3F2 [T00630]; 148; 154; 5.963103;  
AAATAAT; 0.73242; 0.98415;  
MITF 1500bp upstream region; POU3F2 [T00630]; 156; 162; 8.108417;

CCCATTT; 0.18311; 0.15867;  
MITF 1500bp upstream region; POU3F2 [T00630]; 349; 355; 5.963103;  
CTTATTT; 0.73242; 0.98415;  
MITF 1500bp upstream region; POU3F2 [T00630]; 356; 362; 7.730221;  
AAAATTT; 0.91553; 1.19566;  
MITF 1500bp upstream region; POU3F2 [T00630]; 357; 363; 9.094656;  
AAATTC; 0.27466; 0.33169;  
MITF 1500bp upstream region; POU3F2 [T00630]; 389; 395; 5.963103;  
AAATTAT; 0.73242; 0.98415;  
MITF 1500bp upstream region; POU3F2 [T00630]; 391; 397; 5.963103;  
ATTATTT; 0.73242; 0.98415;  
MITF 1500bp upstream region; POU3F2 [T00630]; 432; 438; 1.767119;  
TACATTT; 0.18311; 0.24110;  
MITF 1500bp upstream region; POU3F2 [T00630]; 451; 457; 8.613781;  
AAATTGT; 0.64087; 0.67044;  
MITF 1500bp upstream region; POU3F2 [T00630]; 459; 465; 2.650678;  
TCCATTT; 0.27466; 0.41195;  
MITF 1500bp upstream region; POU3F2 [T00630]; 468; 474; 7.730221;  
CATATTT; 0.91553; 1.19566;  
MITF 1500bp upstream region; POU3F2 [T00630]; 514; 520; 8.108417;  
CCCATTT; 0.18311; 0.15867;  
MITF 1500bp upstream region; POU3F2 [T00630]; 550; 556; 5.457738;  
AAATGCT; 0.73242; 0.73821;  
MITF 1500bp upstream region; POU3F2 [T00630]; 617; 623; 5.457738;  
AAATGCT; 0.73242; 0.73821;  
MITF 1500bp upstream region; POU3F2 [T00630]; 781; 787; 7.327537;  
AAATTC; 0.91553; 1.19566;  
MITF 1500bp upstream region; POU3F2 [T00630]; 1041; 1047; 0.505365;  
AAATAAA; 0.54932; 0.77377;  
MITF 1500bp upstream region; POU3F2 [T00630]; 1074; 1080; 2.019801;  
AAATCTA; 0.18311; 0.24110;  
MITF 1500bp upstream region; POU3F2 [T00630]; 1105; 1111; 2.272484;  
TATATTT; 0.27466; 0.41195;  
MITF 1500bp upstream region; POU3F2 [T00630]; 1115; 1121; 2.650678;  
TCCATTT; 0.27466; 0.41195;  
MITF 1500bp upstream region; POU3F2 [T00630]; 1154; 1160; 5.710420;  
AAATCAG; 0.73242; 0.73821;  
MITF 1500bp upstream region; POU3F2 [T00630]; 1220; 1226; 0.252682;  
AAATCAA; 0.54932; 0.77377;  
MITF 1500bp upstream region; POU3F2 [T00630]; 1337; 1343; 0.252682;  
AAATCCA; 0.54932; 0.77377;  
MITF 1500bp upstream region; POU3F2 [T00630]; 1365; 1371; 6.822173;  
GGCATTT; 0.54932; 0.52790;  
MITF 1500bp upstream region; POU3F2 [T00630]; 1454; 1460; 7.730221;  
AATATTT; 0.91553; 1.19566;  
MITF 1500bp upstream region; USF-1 [T00875]; 108; 114; 9.763061;  
TCAGTGG; 0.36621; 0.15632;  
MITF 1500bp upstream region; USF-1 [T00875]; 835; 841; 9.763061;  
CCACTGA; 0.36621; 0.15632;  
MITF 1500bp upstream region; USF-1 [T00875]; 882; 888; 9.763061;  
CCACTGA; 0.36621; 0.15632;  
MITF 1500bp upstream region; USF-1 [T00875]; 1351; 1357; 10.653315;  
CCACACC; 1.09863; 0.49365;  
MITF 1500bp upstream region; USF-1 [T00875]; 1396; 1402; 5.152973;

CCACTTC; 0.73242; 0.41833;  
MITF 1500bp upstream region; Mitf [T01554]; 501; 513; 14.067903;  
AGCACCTGACGTG; 0.01502; 0.00638;  
MITF 1500bp upstream region; LEF-1 [T02905]; 336; 343; 6.707850;  
CTTTGAAA; 0.09155; 0.08561;  
MITF 1500bp upstream region; LEF-1 [T02905]; 520; 527; 8.109591;  
TCACAAAG; 0.22888; 0.16519;  
MITF 1500bp upstream region; LEF-1 [T02905]; 577; 584; 9.209639;  
CTTTGGCC; 0.18311; 0.09642;  
MITF 1500bp upstream region; LEF-1 [T02905]; 638; 645; 8.624259;  
AGACAAAG; 0.18311; 0.12147;  
MITF 1500bp upstream region; LEF-1 [T02905]; 946; 953; 7.205343;  
CTTTGAGC; 0.09155; 0.08101;  
MITF 1500bp upstream region; LEF-1 [T02905]; 1221; 1228; 0.531842;  
AATCAAAG; 0.09155; 0.08561;  
MITF 1500bp upstream region; LEF-1 [T02905]; 1380; 1387; 8.011275;  
TTGCAAAG; 0.22888; 0.16519;  
MITF 1500bp upstream region; LEF-1 [T02905]; 1424; 1431; 9.226813;  
TCCCAAAG; 0.18311; 0.09642;  
MITF 1500bp upstream region; FOXD3 [T02290]; 59; 66; 5.412889; CCCTGTTT;  
0.13733; 0.10109;  
MITF 1500bp upstream region; FOXD3 [T02290]; 85; 92; 4.835029; TGCTGTTT;  
0.18311; 0.12873;  
MITF 1500bp upstream region; FOXD3 [T02290]; 137; 144; 0.184733;  
AAACATTA; 0.09155; 0.11443;  
MITF 1500bp upstream region; FOXD3 [T02290]; 452; 459; 0.461834;  
AATTGTTT; 0.09155; 0.11425;  
MITF 1500bp upstream region; FOXD3 [T02290]; 557; 564; 2.060269;  
TCTTGTTT; 0.22888; 0.22054;  
MITF 1500bp upstream region; FOXD3 [T02290]; 1318; 1325; 4.370924;  
AAACAGAG; 0.13733; 0.12406;  
MITF 1500bp upstream region; FOXD3 [T02290]; 1484; 1491; 5.207923;  
TGGTGTTT; 0.18311; 0.12873;  
MITF 1500bp upstream region; FOXD3 [T04166]; 126; 136; 14.158476;  
GAAAGAACAAT; 0.09012; 0.11075;  
MITF 1500bp upstream region; FOXD3 [T04166]; 1169; 1179; 13.371894;  
AAAAAAGAAA; 0.06008; 0.08496;  
MITF 1500bp upstream region; USF-1 [T00877]; 1403; 1413; 2.080477;  
CTAGCACATGC; 0.02003; 0.01131;  
MITF 1500bp upstream region; CREB [T00989]; 507; 516; 10.487463;  
TGACGTGCCC; 0.07725; 0.03337;  
MITF 1500bp upstream region; CREB [T00163]; 507; 515; 2.041286;  
TGACGTGCC; 0.13733; 0.07620;  
MITF 1500bp upstream region; CREB [T00164]; 507; 515; 5.639863;  
TGACGTGCC; 0.09727; 0.05069;  
OAl 1500KB upstream region; POU3F2 [T00630]; 156; 162; 9.978215;  
GCAATTT; 0.18311; 0.18057;  
OAl 1500KB upstream region; POU3F2 [T00630]; 164; 170; 8.613781;  
AAATTGT; 0.64087; 0.67044;  
OAl 1500KB upstream region; POU3F2 [T00630]; 357; 363; 0.252682;  
TGGATTT; 0.54932; 0.77377;  
OAl 1500KB upstream region; POU3F2 [T00630]; 608; 614; 8.841973;  
AAATCTC; 0.27466; 0.33169;  
OAl 1500KB upstream region; POU3F2 [T00630]; 645; 651; 5.710420;

AGGATTT; 0.73242; 0.73821;  
OA1 1500KB upstream region; POU3F2 [T00630]; 719; 725; 8.613781;  
CCAATTT; 0.64087; 0.67044;  
OA1 1500KB upstream region; POU3F2 [T00630]; 961; 967; 8.361098;  
ACGATTT; 0.64087; 0.67044;  
OA1 1500KB upstream region; USF-1 [T00875]; 207; 213; 10.653315;  
CCACACA; 1.09863; 0.49365;  
OA1 1500KB upstream region; USF-1 [T00875]; 296; 302; 6.485888; CCACTAG;  
0.36621; 0.17813;  
OA1 1500KB upstream region; USF-1 [T00875]; 373; 379; 5.121209; GATGTGG;  
0.73242; 0.41833;  
OA1 1500KB upstream region; USF-1 [T00875]; 486; 492; 11.607096;  
TTAGTGG; 1.09863; 0.59829;  
OA1 1500KB upstream region; USF-1 [T00875]; 564; 570; 10.653315;  
GGCGTGG; 1.09863; 0.49365;  
OA1 1500KB upstream region; USF-1 [T00875]; 630; 636; 0.000000; CCACGTG;  
0.36621; 0.17808;  
OA1 1500KB upstream region; USF-1 [T00875]; 839; 845; 5.563870; CCACCCG;  
0.36621; 0.13403;  
OA1 1500KB upstream region; USF-1 [T00875]; 1354; 1360; 5.152973;  
CCACTTC; 0.73242; 0.41833;  
OA1 1500KB upstream region; USF-1 [T00875]; 1362; 1368; 0.000000;  
CCACATG; 0.36621; 0.17808;  
OA1 1500KB upstream region; USF-1 [T00875]; 1466; 1472; 10.685079;  
CCACCCC; 1.09863; 0.49365;  
OA1 1500KB upstream region; Mitf [T01554]; 1361; 1373; 6.507668;  
GCCACATGATCCG; 0.00460; 0.00262;  
OA1 1500KB upstream region; USF1 [T00874]; 629; 637; 1.761227;  
ACCACGTGC; 0.07439; 0.03130;  
OA1 1500KB upstream region; USF1 [T00874]; 630; 638; 2.100004;  
CCACGTGCA; 0.07439; 0.03130;  
OA1 1500KB upstream region; USF1 [T00874]; 913; 921; 8.890372;  
ACACGCGGT; 0.21744; 0.07993;  
OA1 1500KB upstream region; USF1 [T00874]; 1377; 1385; 7.441259;  
GCCGCGTGA; 0.13161; 0.04401;  
OA1 1500KB upstream region; LEF-1 [T02905]; 387; 394; 7.665637;  
GTCCAAAG; 0.16022; 0.10553;  
OA1 1500KB upstream region; LEF-1 [T02905]; 473; 480; 7.205343;  
CTTTGAGC; 0.09155; 0.08101;  
OA1 1500KB upstream region; LEF-1 [T02905]; 1416; 1423; 6.548415;  
GTACAAAG; 0.09155; 0.08561;  
OA1 1500KB upstream region; FOXD3 [T02290]; 138; 145; 3.910247;  
CAGTGTTT; 0.11444; 0.10419;  
OA1 1500KB upstream region; FOXD3 [T02290]; 236; 243; 3.910247;  
AAACACTG; 0.11444; 0.10419;  
OA1 1500KB upstream region; FOXD3 [T02290]; 575; 582; 5.112129;  
AGCTGTTT; 0.18311; 0.12873;  
OA1 1500KB upstream region; FOXD3 [T02290]; 604; 611; 1.295405;  
AAACAAAT; 0.13733; 0.15122;  
OA1 1500KB upstream region; FOXD3 [T02290]; 676; 683; 4.651452;  
AAACACAT; 0.13733; 0.12406;  
OA1 1500KB upstream region; FOXD3 [T04166]; 984; 994; 13.371894;  
AAAAAAAAAAAA; 0.06008; 0.08496;  
OA1 1500KB upstream region; FOXD3 [T04166]; 985; 995; 14.158476;

AAAAAAAAAAG; 0.09012; 0.11075;  
OA1 1500KB upstream region; USF-1 [T00877]; 372; 382; 14.506027;  
AGATGTGGTAT; 0.10300; 0.08274;  
OA1 1500KB upstream region; USF-1 [T00877]; 1359; 1369; 7.415898;  
TCGCCACATGA; 0.03147; 0.01802;  
PMEL 1500KB upstream region; POU3F2 [T00630]; 176; 182; 9.472851;  
AAATGGC; 0.18311; 0.13544;  
PMEL 1500KB upstream region; POU3F2 [T00630]; 221; 227; 0.252682;  
AAATCAA; 0.54932; 0.77377;  
PMEL 1500KB upstream region; POU3F2 [T00630]; 305; 311; 5.963103;  
AGAATTT; 0.73242; 0.98415;  
PMEL 1500KB upstream region; POU3F2 [T00630]; 762; 768; 7.730221;  
AATATTT; 0.91553; 1.19566;  
PMEL 1500KB upstream region; POU3F2 [T00630]; 798; 804; 5.963103;  
AAATTAT; 0.73242; 0.98415;  
PMEL 1500KB upstream region; POU3F2 [T00630]; 800; 806; 5.963103;  
ATTATTT; 0.73242; 0.98415;  
PMEL 1500KB upstream region; POU3F2 [T00630]; 900; 906; 1.767119;  
AAATGTA; 0.18311; 0.24110;  
PMEL 1500KB upstream region; POU3F2 [T00630]; 971; 977; 5.963103;  
ATTATTT; 0.73242; 0.98415;  
PMEL 1500KB upstream region; POU3F2 [T00630]; 978; 984; 0.252682;  
TTGATTT; 0.54932; 0.77377;  
PMEL 1500KB upstream region; POU3F2 [T00630]; 985; 991; 8.613781;  
AAATTGT; 0.64087; 0.67044;  
PMEL 1500KB upstream region; POU3F2 [T00630]; 1043; 1049; 8.613781;  
CCAATTT; 0.64087; 0.67044;  
PMEL 1500KB upstream region; POU3F2 [T00630]; 1055; 1061; 8.841973;  
GAGATTT; 0.27466; 0.33169;  
PMEL 1500KB upstream region; POU3F2 [T00630]; 1080; 1086; 8.108417;  
AAATGGT; 0.18311; 0.15867;  
PMEL 1500KB upstream region; POU3F2 [T00630]; 1173; 1179; 5.963103;  
AGAATTT; 0.73242; 0.98415;  
PMEL 1500KB upstream region; POU3F2 [T00630]; 1342; 1348; 2.019801;  
AAATCTA; 0.18311; 0.24110;  
PMEL 1500KB upstream region; POU3F2 [T00630]; 1390; 1396; 5.963103;  
AAATTCT; 0.73242; 0.98415;  
PMEL 1500KB upstream region; POU3F2 [T00630]; 1428; 1434; 9.472851;  
GCCATTT; 0.18311; 0.13544;  
PMEL 1500KB upstream region; POU3F2 [T00630]; 1453; 1459; 9.472851;  
AAATGGC; 0.18311; 0.13544;  
PMEL 1500KB upstream region; USF-1 [T00875]; 1; 7; 11.575332; TTTGTGG;  
1.09863; 0.59829;  
PMEL 1500KB upstream region; USF-1 [T00875]; 133; 139; 9.731297;  
GCTGTGG; 0.36621; 0.15583;  
PMEL 1500KB upstream region; USF-1 [T00875]; 141; 147; 6.006507;  
AAAGTGG; 0.36621; 0.23847;  
PMEL 1500KB upstream region; USF-1 [T00875]; 159; 165; 11.607096;  
TTGGTGG; 1.09863; 0.59829;  
PMEL 1500KB upstream region; USF-1 [T00875]; 162; 168; 11.607096;  
GTGGTGG; 1.09863; 0.59829;  
PMEL 1500KB upstream region; USF-1 [T00875]; 366; 372; 10.653315;  
TGCGTGG; 1.09863; 0.49365;  
PMEL 1500KB upstream region; USF-1 [T00875]; 721; 727; 5.121209;

CCACATC; 0.73242; 0.41833;  
PMEL 1500KB upstream region; USF-1 [T00875]; 816; 822; 10.685079;  
GGAGTGG; 1.09863; 0.49365;  
PMEL 1500KB upstream region; USF-1 [T00875]; 822; 828; 10.685079;  
GGAGTGG; 1.09863; 0.49365;  
PMEL 1500KB upstream region; USF-1 [T00875]; 910; 916; 9.731297;  
CCACAGC; 0.36621; 0.15583;  
PMEL 1500KB upstream region; USF-1 [T00875]; 987; 993; 12.428866;  
ATTGTGG; 0.36621; 0.23857;  
PMEL 1500KB upstream region; USF-1 [T00875]; 1186; 1192; 11.538613;  
CCACCCT; 1.09863; 0.59829;  
PMEL 1500KB upstream region; USF-1 [T00875]; 1199; 1205; 5.152973;  
CCACTTC; 0.73242; 0.41833;  
PMEL 1500KB upstream region; USF-1 [T00875]; 1275; 1281; 6.485888;  
CCACCAG; 0.36621; 0.17813;  
PMEL 1500KB upstream region; USF-1 [T00875]; 1358; 1364; 5.152973;  
GAGGTGG; 0.73242; 0.41833;  
PMEL 1500KB upstream region; USF-1 [T00875]; 1445; 1451; 10.653315;  
CCACACA; 1.09863; 0.49365;  
PMEL 1500KB upstream region; Mitf [T01554]; 1306; 1318; 8.542309;  
TTGCTCATGTGCA; 0.00706; 0.00394;  
PMEL 1500KB upstream region; LEF-1 [T02905]; 90; 97; 9.226813; CCCCAAAG;  
0.18311; 0.09642;  
PMEL 1500KB upstream region; LEF-1 [T02905]; 137; 144; 9.555277;  
TGGCAAAG; 0.13733; 0.07565;  
PMEL 1500KB upstream region; LEF-1 [T02905]; 890; 897; 8.092417;  
CTTTGTCC; 0.22888; 0.16519;  
PMEL 1500KB upstream region; LEF-1 [T02905]; 998; 1005; 9.555277;  
CTTTGCCT; 0.13733; 0.07565;  
PMEL 1500KB upstream region; LEF-1 [T02905]; 1007; 1014; 8.251852;  
CTTTGACT; 0.18311; 0.12147;  
PMEL 1500KB upstream region; LEF-1 [T02905]; 1047; 1054; 6.707850;  
TTTCAAAG; 0.09155; 0.08561;  
PMEL 1500KB upstream region; LEF-1 [T02905]; 1154; 1161; 8.197478;  
CTTTGGAA; 0.22888; 0.16519;  
PMEL 1500KB upstream region; FOXD3 [T02290]; 80; 87; 1.018305; TTTTGT  
TTT; 0.09155; 0.11446;  
PMEL 1500KB upstream region; FOXD3 [T02290]; 151; 158; 4.278557;  
ATCTGTTT; 0.13733; 0.12406;  
PMEL 1500KB upstream region; FOXD3 [T02290]; 336; 343; 3.910247;  
CAGTGTTT; 0.11444; 0.10419;  
PMEL 1500KB upstream region; FOXD3 [T02290]; 748; 755; 4.743818;  
AAACACAG; 0.13733; 0.12406;  
PMEL 1500KB upstream region; FOXD3 [T02290]; 1120; 1127; 5.043422;  
TCCTGTTT; 0.18311; 0.12873;  
PMEL 1500KB upstream region; FOXD3 [T02290]; 1231; 1238; 4.001457;  
TTCTGTTT; 0.11444; 0.10419;  
PMEL 1500KB upstream region; FOXD3 [T04166]; 974; 984; 13.371894;  
ATTTTTGATTT; 0.06008; 0.08496;  
PMEL 1500KB upstream region; USF-1 [T00877]; 1310; 1320; 9.496375;  
TCATGTGCAGT; 0.04506; 0.01972;  
PMEL 1500KB upstream region; USF-1 [T00877]; 1457; 1467; 10.883360;  
GGCTCACATGG; 0.02038; 0.00808;

-- END -----



>MITF-promoter-1500bpUpstream-pos23041-24540

aaatgtatgttcatctcaagaaagtcttatataggtataagattttatttggacactgatc  
cctgttttagatctctgtcacaacagtgctgtttgcttgattattttcagtggaattt  
ctggaagaaagaacaataaacattaataaaaataattcccatttctaattcccataatgct  
cttaaagtaactagatagctatgctgtcctatgggtatcctatgctgacctgtcctacct  
atcctaccctaccctaccctaccctaccctaccctaccctaccctaccctaccctaccct  
gtcctgtcctatgtgtgtctttagcctaatactacacctttgaaaactctcttattttaa  
tttctctcttaagcactaatacatctaataaattattttcagatactacatagaagagtc  
accttcactgattacatttttttcaatattaaattgtttccattttacatattttgata  
cagttcgcactgtcaccagtagcacctgacgtgccatttcacaaaggacttttagatg  
cttgagaataaaaatgcttctgtttgctcgcacaaaactttggccctattgttgtaatgc  
atgcagggtctagaacaaaatgctgcaggagattgtccagacaaagctgacctacctaga  
cattcaccagttttctcacaatgttgtcagacagtaattcccctgaatataacattcctg  
tcttgctatagcagttctttacctgagctgctgggtgacagccccattgagctggagtag  
aaaattcccataagagctggactaggaagtcccattgaaactggattagaaagttcccact  
gagctctactagaaagtcccattgagttggactagaagtcccactgagctggactaga  
ctgctgagttcaggtcctccttaggcatgaaagccgctgggtgactttgagccagcta  
ctgtctctcagcactactttataggggtgttgctgggaaaaaagtaggcaggagcattat  
gtacactgccttgagttgcaaaaataaagacaggatatcagtctaataatcaataaatct  
atagggacctcttattgagagggcatatatttgattccattttcagtatgataactgggc  
ccctattgggttccaaaatcaggccttaccaaaaaaagaaaaagaaaaaggaataaaggaa  
tcctgactgaaagagtagggaaatcaagacaacttctgtctccttttgaattagtagc  
tataatcactgggggtgctgatcattagaaagactagaacatagctaacttcttggttaa  
acagagatcaagcccagaaatccatatacatccacaccctgcccaggcatttttctacac  
ttgcaaagggtttttgccacttcttagcacatgcaatggccccctcccaaagcctgactc  
tttaaactccagctaataatttactgagcagtgatgagtggtctctggtgtttccctcagc

>TYR-promoter-1500bpUpstream-pos19738-21237 (reverse complemented)

aactaaaatctggaagtataatttgtgggcacctttggggcaagatttccaaccaggcaaa  
gtgagacttgtattttatttaggtatcacatattgcattgatttctatactatccaactgg  
gtggatcaccaaccttgggtggattgctacatgtagaaataatcccatgataagcaaaaca  
tcaatgacatgccacagcacaatgcccaacagcctagaaatgataaaaaaggtcaatgt  
ggaatataaacctcccagtgatttctcagaaggctgctcaacaaaatgggtcttgaga  
gacttctcagaagctgctaggagaggtgccatgtgaacctctggaggcaaagtaatctat  
aatgtcagggccatgccagaagataggctccaggcccatcatcccctctctggaaacatg  
gctgaatcactttggagcagaaggacctaaggtatcctggacctaaagtataaagagctt  
tataagtcaacaccttattggaagacaaatggcagctaataccacaagcataaaacagat  
gctaggttccagcagcagcctccaccattaatagcctaaccacttcattttgtaccacca  
actccaccagctttggagtcatttcaaagtcagccccatgtaaagtgattatagtagt  
ctagccatggcataatgagggcatgagctctcagtgcccctgcccagctccttctgcaac  
gaataaaaaaatttgcaatgactgtttgtctcgcaacatgtctgtgtgtgcatgcatacg  
cgtgctttgtgatttccaaacagcaccttggagtttactgttctgtagtccaataaatga  
aagctcttgcctatcttctcacaccctgctttttaaaaaaataattagcgtttatatgc  
aacacaattaagtataaatggaactgccatgactgcctttactgctcccccaattgattg  
gtatgtgtgtgtctaggaaagttttacacacatttcttctgcttagaaacatacataag  
accatctcttctggtcttatgactgaaggactttggatcaactttcttctgatttgtg  
ggatttgttgagctcagcctttgaaaagtggagtttttccccctgtagtcaactcaattgt  
tcattctcattcctctgcacaagagcccagtgattccctctccaagtaccttgggtgtgag  
caagcactccgatccagcagctcaaaagtcatgtgctaggcagaagatgaagttcgaaaa  
atgagtctctgtataactgaagtggcaagtgggtaaacgttcttggatgtagccctgag  
catgtgataatcagattacagaatgtgtgtatgtgtcaagagagagaagcaacttgaat  
gaggtaccagtaagaaatgtaggggagaacttctcagcctgtgagacggacaaaaactt  
cctgtcaggagtttaactgaactaccaggcaggacagcagattttctgtctgaaaggcaa

>RAB27A 1500KB upstream region

cattttcttagaacattatccacgtgcataagaatgcggtcacatthtaagtgcctttt  
gccgaacttaagtgtgccaattaatagggcctgtgaacctcgtttctgcttatgtcctc  
aatcaaaaggagcagacccccctcttttaggcactctccccacttctgccaagggcctctc  
atthccatggcaccaaactcagtcacgctgctgctggaccagccttccctatgggtgctc  
cgtgthggcccaggthcaagatgctcttaaataacgcgctaaaaggatthttttctcat  
gcactctgthccaccataatagctgaaacaagtctthattaaggagtcatatgatgctga  
ttatatcttgatthgtcagthgtacagcaaaaccacagatcttccctgthgtggcagga  
aaaccacaaaccgtgggtgctgthggagthcttctgaatcagthctctthaaact  
acacatgcaaggagatgthggagaatthggcaggaaaagaagthggccaaggccaatggaa  
aaacatcaagtatatggaggaagthtaattaacgtagtataaggaagaactgctthatt  
aaacthgccatgcacacaagaaaatctctatgaaatattaccacatgggggggtctaaccga  
atgccctthggaagggcggggggtgcaggtgctgctgcctccccacatgccctcagc  
cctgcgaggcaacacccaaggthgggtgctgcaggggcacggacctgthgcagaccagc  
caggcgtgcagcagaggcagctcgcgtgcactcctgcaactgcagthgcagtcagtg  
tctgcgtctggagaacagctgthggaccaggatctcctgthtccgaacagagcagcct  
atcactthaccagctgaaacagacaagagggthctgctccaaggcagcagthgcaggt  
ggthgctgcctctgcatcctggctgthgatccagacaggacctcagagthcaggat  
cctthtgaaaaggatgthgaatctthtgcactthggggggcttcacacatactccactctg  
atgacgtatgaaagaaaacacccaaggthgtgcaatcaactgathtagcaagagaaatgg  
ctgthttagctgcagggactgataaacctgggcagcaccacttctacagaagccggcc  
ataccgtgacggthtctcctcgtaatctthtgcagcaacaaagcaagcaacagcagctcct  
gathcatcctgcactgthgagthgaatgggcagthtthtcttgaagthgccaaggctaca  
gaagcctcagccggggacaaggctgcttccaaggactgcagagagthccttcccctc  
ttccacggthacctcctgcaagcagthggcggttccagcctcagggcctcccctggthcct  
ctgcccagthccccccccgctcctcccccaacacaggaaatcctgcttccaactgthggg

>MLANA 1500KB upstream region

acttctctthtgtgaaagtaagtgacccaatthtagatthgthtaagaggggcataatgga  
gagatthaatccagthgattgthtatgcccccaatthcaaatcctctgthgthtaatthaaa  
taatgaaaagggccatgaaatctctatagthataaccagthtagatctthaatcaaatagth  
gthcatcaagthagthtaattacgthcaggggactthaccctaaatgthtatatcagactgca  
tctgagthcctgaaatthgagthgagthaccagatthtagatgcaagctaaatgthatt  
tthaatataagthattthataaattthataactgcttctthtgaagagggcctaaagthgthg  
tatataataagthgacggthaatatgacaccaatgcaaaataccatggaatacagaacaaaa  
aaacacatcggcatacaaaagthcattthatagathatgaaaatgctgagaaactgthgagth  
tgagaggggathgaaatgthgtcatctcaccataaaactgthcactgggaatthcctaccagth  
cctcacctactactctcgcataagggcatgaaatgthgthgaaatthtaattgthcaagac  
aaacagaaagthgataataccagactthcaataaatcctatcacacaaaactgaaaaat  
ctagaagatgagaacacatthttagcatcttctccaaagthcctthcaacaaaaaaatgth  
aaatgathgthtthcagggactgthaatgctgathaatgthgctatthctthcatatthaat  
actgaaatgthtthtaatgthgctgthtthctgthtthcattthgaggaatathcaacathgth  
tctgthtatgaaatthctgaaatagagthtthaaaagagcaggaatgthgathagthaaatthact  
taatthcctcaccaaagctthtctcccagctatthctthtctcccagthattactccaaagga  
aaaaggcaagthaggaagacgthattctgggggcaaaatgthaaatcattagaagthttht  
tgcaccctaaatgthgagthgcatgcaagthtthataccagatthggacaggactgthgagthgg  
tcataatcctggatctthattthgctthttagaaaactagcaaaataagctatthgagthgth  
taagthaggcactatctgatgacagthtthgaaatcagagaaagthtctatthgcatctthata  
atgthctaaaagataaaatthgctcagathgathctthaaatcctgthgaaatthtatathagacac  
atcctthgcagthtthctthgcaataacagaagthgathtthcattgthtthctcccaggaat  
tthtthattcattthcccagthtaggthcatagctctggathtcccagatgthtcccacaat  
cctgathgaaatthctagathcagccaagthtagcthaaatccccctthtthgthtagthattgcca  
tggathtthcaggaagactgthcctgthtthtthataatthtthattacathgathagthtthaaa

>DCT 1500KB upstream region

ttacatgtaatcaggaggacaatcaaaagcaaggggaagggaatgaaaatctcaaacaa  
ttaattaaaacaaactaacataactgaaaagaatacccacatatgtacactctaacagta  
acaactatagttatagtacagaactttataaaccttctagagaattttgaaggtaaatcg  
gaaaagaggagaacgttcttctgatcatttgcccaaggcaattggatcaaaagattaaga  
aggcaagagagcaatcactgaaaataagtttgcccaaatatgtaacaagcatgagggtt  
ttagagaagctggctcctgggtcccggtgcactaatgaattggaagacctcttaggaactt  
ggaccagactcatagatgggtctgcttctagaaggcttgaatctttataattaccagtc  
tgtgagccatctaacagggtggtgatcatctttgctttaaaaagtattttatattatagta  
gtaggtatacagttaccatcttagatgctaggcaaacacagaattgtattaataaactga  
tgagcctgggtcagtaaaatcttatttgctctctctaaacaacagaaaacgttcctccc  
aaatattttaaaatgtgctgaatgtggatgctcttagtcttccagtataagtaaatctg  
caagcctctaagtgaagatcactttctttggtgggacatgactgatgatgaaccggtcct  
ctttacatcactgtatgagacacatcataaaaatggagattcatttttaaacactgtaag  
agtcttgggtatcatagctagaaaacaggtggcagaaaatgtcatttgaatataacctgaa  
tgtagatatcagctcactatgaaggctacaacatggtaatgtgtattgtcttctgccatg  
tggtagctcgtgatcctttaagtttccagagtgaattacaatattcaactatagttgct  
gtggaggtccataattttgcaatctcttacaagctctcaagaaaacttgcaccctcag  
cccacagcatgaagtctgaggtcgtgggtctcataaagcactgagcagaagaaaagataaa  
gcaatgggaatcaaagacgttttgtctccctcgtccagggcttctccccagcattccat  
gggtttctttttgcttgtaatgtcatgtgctaatacagaagggttttcaaaaagctaatac  
ttctaattaggggttactgacccccaaatataaaaatctccagctacggcctcttgga  
caaaaagagctaaactgtttgctattaaccacattcagtcctggtaatcttggaataa  
gcaaagaccctgaaggtaacctagttgcagtgaggaggaaaattgcttctcgggtca  
gttcgaatggggcttgcctcatccagctggagatggctaataataatcttttactgtatc  
ctgcattagaaccacaggctgagcagcagagtttgggaagctctgggaattagatcttg

>AIM1 1500KB upstream region

caggatTTTTGAAGATACATGCATAAGACTAAACATTTTTTCAAGAAAGAGAGAAGTGGA  
AGCAGACTAGAAAAAATGGAAATAATAGATGATAGAAAAGAGGCAAAACCACAGGTTT  
GCCTGACAGACAAATCCTAGGACCTACAAAGACTGTGGCAGCAGCAAAACATGCCACTCC  
CTTTATTGGTTTCTTCTTAATGGAATATTATTTTTATGCTTTTTTTAAAATGGTAGGTT  
GGCTTGAGTGTCAAAAGAAAATAAATGTTAAATGTGTTTTCTGAAACCTACATGGAATT  
TCAGTTCAGATTCAACTACCTCTGCTTAAGCATTACTCCAAATCACAGCATATCAGG  
AAAATCCTCTGTCAACTGCAAAGACAGAAGATGGCCCTGTGTATTATTTTTCATCAAA  
CAATAATAATTTAAATTTTTGCATTTTTGGAGCCAATGGGGAATTTTTTCTATCATAA  
ATTGAAAATGGAGGGGTAGCTTCTATCAGGGTTATAATCTGGGAAAGAAGGATTACTTT  
TAAGAAGTAATTTAAAAAATTGTACCATACTTACAATTCATGAGTGGAAATAGTTACCCCA  
AGATTCACTATGCTTCACTCCAATGTGCTTTTTGCTATTCTTTACTCTTTTCTGTGTAT  
ACATTTTTCAGATATGCAAAGTTTGAATTACGTTTACAGTACAAGCTGCTACATGCCTG  
TATAGTCAGAAAATAAATCGCTGAGAGTTCAGTGGTGAGAAGAGTATTGCCACATGAATGG  
TGACCGGGTGGGCTGTTTTGCTTCTGAGTCCAAACTATTGGCCCCATGGACTCTGTTGT  
TAATACAAACATATCAGGCTTTTTGCAAAAATAAAAATCCTTTTAAAAAATCTCCTTGT  
CTCAAAGAACTCACAGCAGAGAAGACAGTATGTCCTGGACTACCTTAAATGTAGCAATT  
TGTCTTTTTCATATGGTTTCTTATTTATTTATATCAAAATTTATATAGCCGCCAGTTC  
ACTCTGGGCAGGGTACAACGAAGATATAAAAACAAGAGTTTCTGGATACTTGCAGCCCTT  
CCTTGCAAAACTGTTGATCATTCTGCTCCATCAGAAAAGAAACAACAACCCTTATTACT  
GCCTTGCAATTTATATCCTCGGATCAGTCGAGTCTCTCCCTTCTCGGGTAACACGCAGTA  
TGAAGGGGAGCTGGAGTGGCAGTCAATTTTCTGCTTCAAGACCACGAAGTGGCAGCCCTT  
TAAACGGAACAAAGGAGGGTCCCAGCCCCGAGAGAAGTAGTTGCAGTCGCGGAAATAGG





# CREB

>Python-bivittatus gi|602656083|ref|XP\_007433779.1| PREDICTED: cyclic AMP-responsive element-binding protein\_1 isoform X1 [Python bivittatus]  
MTMESGADNQQSGDAAVTEAENQQMTVPAQPQIATLAQVSM PAAHATSSAPT VTLVQLPNGQTVQVHGVI  
QAAQPSVIQSPQVQTVQISTIAESED SQESVDSVTD SQKRREILSRRPSYRKILNDLSSDAPGVPRIEEEE  
KSEEEATAPAITTVTVPTPIYQTSSGQYRTGVADIHHQYGN AVHAVAITQGGAIQLANNGTDGVQGLQTL  
TMTNAAATQPGTTILQYAQT TDGQQILVPSNQVVVQAASGDVQTYQIRTAPTSTIAPGVVMAS SPALPTQ  
PAEEAARKREVRLMKNREAAARECRRKKKEYVKCLENRVAVLENQNKT LIEELKALKDLYCHKSD

>Homo-sapiens gi|4758054|ref|NP\_004370.1| cyclic AMP-responsive element-binding protein 1 isoform A [Homo sapiens]  
MTMESGAENQQSGDAAVTEAENQQMTVQAQPQIATLAQVSM PAAHATSSAPT VTLVQLPNGQTVQVHGVI  
QAAQPSVIQSPQVQTVQISTIAESED SQESVDSVTD SQKRREILSRRPSYRKILNDLSSDAPGVPRIEEEE  
KSEETSAPAITTVTVPTPIYQTSSGQYIAITQGGAIQLANNGTDGVQGLQTLTMTNAAATQPGTTILQY  
AQT TDGQQILVPSNQVVVQAASGDVQTYQIRTAPTSTIAPGVVMAS SPALPTQPAEEAARKREVRLMKNR  
EAARECRRKKKEYVKCLENRVAVLENQNKT LIEELKALKDLYCHKSD

>Mus-musculus gi|82546874|ref|NP\_598589.2| cyclic AMP-responsive element-binding protein 1 isoform A [Mus musculus]  
MTMESGADNQQSGDAAVTEAENQQMTVQAQPQIATLAQVSM PAAHATSSAPT VTLVQLPNGQTVQVHGVI  
QAAQPSVIQSPQVQTVQISTIAESED SQESVDSVTD SQKRREILSRRPSYRKILNDLSSDAPGVPRIEEEE  
KSEETSAPAITTVTVPTPIYQTSSGQYIAITQGGAIQLANNGTDGVQGLQTLTMTNAAATQPGTTILQY  
AQT TDGQQILVPSNQVVVQAASGDVQTYQIRTAPTSTIAPGVVMAS SPALPTQPAEEAARKREVRLMKNR  
EAARECRRKKKEYVKCLENRVAVLENQNKT LIEELKALKDLYCHKSD

>Gallus-gallus gi|45383261|ref|NP\_989781.1| cyclic AMP-responsive element-binding protein 1 [Gallus gallus]  
MTMESGAENQQSGDAAVTEAETQQMTVQAQPQIATLAQVSM PAAHATSSAPT VTLVQLPNGQTVQVHGVI  
QAAQPSVIQSPQVQTVQISTIAESED SQESVDSVTD SQKRREILSRRPSYRKILNDLSSDAPGVPRIEEEE  
KSEETAAPAIATVTVPTPIYQTSSGQYIAITQGGAIQLSNNGT DGVQGLQTLTMTNAAATQPGTTILQY  
AQT TDGQQILVPSNQVVVQAASGDVQTYQIRTAPTSTIAPGVVMAS SPALPTQPAEEAARKREVRLMKNR  
EAARECRRKKKEYVKCLENRVAVLENQNKT LIEELKALKDLYCHKSD

>Ophiophagus-hannah\_PARTIAL gi|565320082|gb|ETE71081.1| Cyclic AMP-responsive element-binding protein 1, partial [Ophiophagus hannah]  
MESGAENQQSGDAAVTEAENQQMTVQAQPQIATLAQVSM PAAHATSSAPT VTLVQLPNGQTVQVHGVIQT  
AQPSVIQSPQVQTVQISTIAESED SQESVDSVTD SQKRREILSRRPSYRKILNDLSSDAPGVPRIEEEEKS  
EEEATAPAITTVTVPTPIYQTSSGQYIAITQGGAIQLANNGTDGVQGLQTLTMTNAAATQPGTTILQYAQ  
TTD GQQILVPSNQVLLQEMFRPTKFALHPQAPLHLVSSWHL PQLFPLNQKKQHEKEKEAARECRRKKK  
EYVKCLENRVAVLENQNKT LIEELKALKDLYCHKSD

>Anolis-carolinensis gi|637343695|ref|XP\_008116978.1| PREDICTED: cyclic AMP-responsive element-binding protein 1 [Anolis carolinensis]  
MTMESGADNQQSGDAAVTEAENQQMTVSM PAGHGTSAPT VTLVQLPNGQTVQVHGVIQAAQPSVIQSPQ  
VQTVQISTIAESED SQESVDSVTD SQKRREILSRRPSYRKILNDLSSDAPGVPRIEEEEKSEEEAAPAIT  
TVTVPTPIYQTSSGQYIAITQGGAIQLANNGTDGVQGLQTLTMTNAAATQPGTTILQYAQT TDGQQILV  
SNQVVVQAASGDVQTYQIRTAPTSTIAPGVVMAS SPALPTQPAEEAARKREVRLMKNREAAARECRRKKK  
EYVKCLENRVAVLENQNKT LIEELKALKDLYCHKSD

>Alligator-sinensis gi|557293412|ref|XP\_006029184.1| PREDICTED: cyclic AMP-responsive element-binding protein 1 [Alligator sinensis]  
MTMESGAENQQSGDAAVTEAETQQMTVQAQPQIATLAQVSMPPAAHATSSAPTVTLVQLPNGQTVQVHGVI  
QAAQPSVIQSPQVQTVQISTIAESEDSDQESVDSVTDSDQKRREILSRRPSYRKILNDLSSDAPGVPRIEEE  
KSEETSAPAITTVTVPTPIYQTSYGQYIAITQGGAIQLANNGTDGVQGLQTLTMTNAAATQPGTTILQY  
AQTTDGGQILVPSNQVVVQAASGDVQTYQIRTAPTSTIAPGVVMASPPALPTQPAEEAARKREVRLMKNR  
EAARECRRKKKEYVKCLENRVAVLENQNKTLIEELKALKDLYCHKSD

>Canis-familiaris gi|928182529|ref|XP\_013966467.1| PREDICTED: cyclic AMP-responsive element-binding protein 1 isoform X2 [Canis lupus familiaris]  
MTMESGAENQQSGDAAVTEAENQQMTVQAQPQIATLAQVSMPPAAHATSSAPTVTLVQLPNGQTVQVHGVI  
QAAQPSVIQSPQVQTVQISTIAESEDSDQESVDSVTDSDQKRREILSRRPSYRKILNDLSSDAPGVPRIEEE  
KSEETSAPAITTVTVPTPIYQTSYGQYIAITQGGAIQLANNGTDGVQGLQTLTMTNAAATQPGTTILQY  
AQTTDGGQILVPSNQVVVQAASGDVQTYQIRTAPTSTIAPGVVMASPPALPTQPAEEAARKREVRLMKNR  
EAARECRRKKKEYVKCLENRVAVLENQNKTLIEELKALKDLYCHKSD

>Equus-caballus gi|149755007|ref|XP\_001505170.1| PREDICTED: cyclic AMP-responsive element-binding protein 1 isoform X2 [Equus caballus]  
MTMESGAENQQSGDAAVTEAENQQMTVQAQPQIATLAQVSMPPAAHATSSAPTVTLVQLPNGQTVQVHGVI  
QAAQPSVIQSPQVQTVQSSCKDLKRLFSGTQISTIAESEDSDQESVDSVTDSDQKRREILSRRPSYRKILND  
LSSDAPGVPRIEEEEKSEETSAPAITTVTVPTPIYQTSYGQYIAITQGGAIQLANNGTDGVQGLQTLTMT  
NAAATQPATTILQYAQTDDGGQILVPSNQVVVQAASGDVQTYQIRTAPTSTIAPGVVMASPPALPTQPAE  
EAARKREVRLMKNREAARECRRKKKEYVKCLENRVAVLENQNKTLIEELKALKDLYCHKSD

# LEF1

>Python-bivittatus gi|602628890|ref|XP\_007421376.1| PREDICTED: lymphoid enhancer-binding factor 1 [Python bivittatus]  
MPQLSGGGGGPELPCATDEMIPFKDEGDPQKETIFAEISHPEEEGDLADIKSSLVNESEIIPNSNGHGHEV  
SRPGQSQEAYEKGREHPEEGKHTDGVLYNKGPSYSGYSYIMPMNMNDPYMSNGSLSPPIPRTSNKVPV  
VQPSHAVHPLTPLITYSDEHFSPGTHPSHLPDSDVNTKQGMTRHPPGPDSTFYPLSPGSGVQITPPLGWQ  
GQPVYISGGFRQFPSSLSVDTSMSRFSHMIIPGPPGPHTTGIPHPAIVTPQVKQEHPTDSDLMHVKP  
QHEQRKEQEPKRPHIKKPLNAFMLYMKEMRANVVAECTLKESAAINQILGRRWHALSREEQAKYYELARK  
ERQLHMQLYPGWSARDNYGKKKKRKREKLQESTSGTAPRMTAAYI

>Mus-musculus gi|27735019|ref|NP\_034833.2| lymphoid enhancer-binding factor 1 isoform a [Mus musculus]  
MPQLSGGGGGGGPELPCATDEMIPFKDEGDPQKEKIFAEISHPEEEGDLADIKSSLVNESEIIPASNGHEV  
VRQAPSSQEPYHDKAREHPDEGKHPDGLYNGKPSYSSYSGYIMPMNMNSDPYMSNGSLSPPIPRTSNKV  
PVVQPSHAVHPLTPLITYSDEHFSPGSHPSHLPDSDVNSKQGMSRHPPEIPTYPLSPGGVQITPPIG  
WQQQPVPYITGGFRQFPSSLSGDTSMSRFSHMIIPGPPGPHTTGIPHPAIVTPQVKQEHPTDSDLMHV  
KPQHEQRKEQEPKRPHIKKPLNAFMLYMKEMRANVVAECTLKESAAINQILGRRWHALSREEQAKYYELA  
RKERQLHMQLYPGWSARDNYGKKKKRKREKLQESTSGTGPRMTAAYI

>Ophiophagus-hannah\_PARTIAL gi|565315274|gb|ETE67199.1| Lymphoid enhancer-binding factor 1, partial [Ophiophagus hannah]  
MARCEHQYSVFDTRARFTVYAAQALDIRSSNKVPVQPSHAVHPLTPLITYSDEHFSPGTHPSHLPDSDV  
STKQGMNRHPPGPDISTFYPLSPGSGVQITPPLGWQGPVYISGGFRHPYSSLSVDTSMSRFSHMIIP  
GPPGPHTTGIPHPAIVTPQVKQEHPTDSDLMHVKPQHEQRKEQEPKRPHIKKPLNAFMLYMKEMRANWH  
ALSREEQAKYYELARKERQLHMQLYPGWSARDNYSSSLILFFHFPELPI SLHEKYLNAMKSANLGSVAG

LYCAGNTTIVTELYLGCRWYGFYYLPVFFHKIYYGGKKFLNFMSLPYENSLELEI

>Gallus-gallus gi|45384346|ref|NP\_990344.1| lymphoid enhancer-binding factor 1 [Gallus gallus]  
MPQLPGAGGGGGDPELCATDEMIPFKDEGDPQKEKIFAEISHPEEEGDLADIKSSLVNESEIAPGSGGHE  
VSRQTPAQDSYHDKGREHPPEGKHPDGGLYSKGPSYSGYSYIMPMNMNDPYMPNGSLSPPIPRTSNKV  
PVVQPSHAVHPLTPLITYSDEHFSPGSHPSHIPSDVSSKQGMRSRHPAPDIPTFYPLSPGGVGQITPPLG  
WFSHMIIPGPPGPHTTGIPHPAIVTPQVKQEHPHNDSELMHVKQPQHEQRKEQEPKRPHIKKPLNAFMLYM  
KEMRANVVAECTLKESAAINQILGRRWHALSREEQAKYYELARKERQLHMQLYPGWSARDNYGKKKKRKR  
EKLQESASGTGPRMTAAYI

>Homo-sapiens gi|29792286|gb|AAH50632.1| Lymphoid enhancer-binding factor 1 [Homo sapiens]  
MPQLSGGGGGGGDPELCATDEMIPFKDEGDPQKEKIFAEISHPEEEGDLADIKSSLVNESEIIPASNGH  
EVARQAQTSQEPYHDKAREHPDDGKHPDGGLYNKGPSYSSYSGYIMPMNMNDPYMNSGSLSPPIPRTSN  
KVPVVQPSHAVHPLTPLITYSDEHFSPGSHPSHIPSDVNSKQGMRSRHPAPDIPTFYPLSPGGVGQITPP  
LGWQGGPVYPIITGGFRQPYPSSLSVDTSMSRFSHHMIIPGPPGPHTTGIPHPAIVTPQVKQEHPHNDSDLM  
HVKQPQHEQRKEQEPKRPHIKKPLNAFMLYMKEMRANVVAECTLKESAAINQILGRRWHALSREEQAKYYE  
LARKERQLHMQLYPGWSARDNYGKKKKRKRREKLQESASGTGPRMTAAYI

> Alligator-sinensis gi|557297798|ref|XP\_006031200.1| PREDICTED: lymphoid enhancer-binding factor 1 isoform X1 [Alligator sinensis]  
MMPNMNDPYMNSGSLSPPIPRTSNKVVPVVQPSHAVHPLTPLITYSDEHFSPGSHPSHMPSDVNSKQGM  
SRHPAPDIPTFYPLSPGGVGQITPPLGWQGGPVYPISSGFRQPYPSSLSVDPSMSRFSHHMIIPGPPGPH  
TGIPHPAIVTPQVKQEHPHNDSELMHVKQPQHEQRKEQEPKRPHIKKPLNAFMLYMKEMRANVVAECTLKE  
SAAINQILGRRWHALSREEQAKYYELARKERQLHMQLYPGWSARDNYGKKKKRKRREKLQESASGGKRNTF  
STCKTKAATPGPLLEMEAC

>Canis-familiaris gi|74002121|ref|XP\_863402.1| PREDICTED: lymphoid enhancer-binding factor 1 isoform X3 [Canis lupus familiaris]  
MPQLSGAGGGGGDPELCATDEMIPFKDEGDPQKEKIFAEISHPEEEGDLADIKSSLVNESEIIPPTSNG  
HEVARQAQTSQESYHDKAREHPDDGKHPDGGLYNKGPSYSSYSGYIMPMNMNDPYMNSGSLSPPIPRTS  
NKVPVVQPSHAVHPLTPLITYSDEHFSPGSHPSHLPDVSNSKQGMRSRHPAPEIPTFYPLSPGGVGQITP  
PLGWFSHMIIPGPPGPHTTGIPHPAIVTPQVKQEHPHNDSDLMHVKQPQHEQRKEQEPKRPHIKKPLNAFM  
LYMKEMRANVVAECTLKESAAINQILGRRWHALSREEQAKYYELARKERQLHMQLYPGWSARDNYGKKKK  
RKREKLQESTSGGKRNSFPTCKAKAATPGPLLEMEAC

>Thamnophis-sirtalis gi|927194465|ref|XP\_013930427.1| PREDICTED: lymphoid enhancer-binding factor 1 isoform X1 [Thamnophis sirtalis]  
MPQLSGGGGGDPELCATDEMIPFKDEGDPQKETIFAEISHPEEEGDLADIKSSLVNESETIPSSNGHEVSR  
QQQSQEVYEKSREHPPEGKHIDGVLYNKGPYSGYSYIMPMNMNDPYMNSGSLSPPIPRTSNKVVPVVQP  
SHAVHPLTPLITYSDEHFSPGTHPSHLPDVSNTKQGMNRHPPGPDISTFYPLSPGSGVQITPPLGWFSH  
MIIPGPPGPHTTGIPHPAIVTPQVKQEHPHNDSDLMHVKQPQHEQRKEQEPKRPHIKKPLNAFMLYMKEMRA  
NVVAECTLKESAAINQILGRRWHALSREEQAKYYELARKERQLHMQLYPGWSARDNYGKKKKRKRREKLQE  
STSGIFMGTAPRMTAAYI

> Anolis-carolinensis gi|327283645|ref|XP\_003226551.1| PREDICTED: lymphoid enhancer-binding factor 1 isoform X2 [Anolis carolinensis]  
MPQLSGGGGGGGGGGGDPELCATDEMIPFKDEGDPQKEKIFAEISHPEEEGDLADIKSSLVNESETIS  
SSNGHEVSRQGGQPEIYHDKGREHPPEGKHTDGGLYGKGPSYSGYSYIMPMNMNDPYMNSGSLSPPIPR  
RTSNKVVPVVQPSHAVHPLTPLITYSDEHFSPGTHPSHLPDVSNSKQGMRSRHPGPDMPFYPLSPGSGVQ



ITPPLGWQGQPVYPISSGFRQPYPSSLSVDTSMSRFSHHMIPGPPGPHTTGIPHPAIVTPQVKQEHPHD  
SDLMHVKPQHEQRKEQEPKRPHIKKPLNAFMLYMKEMRANVVAECTLKESAAINQILGRRWHALSREEQA  
KYYELARKERQLHMQLYPGWSARDNYGKKKKRKRKREKLQESTSGAAPRMTAAYI

>Equus-caballus gi|545210283|ref|XP\_005607957.1| PREDICTED: lymphoid  
enhancer-binding factor 1 isoform X3 [Equus caballus]  
MVARQAQTSQEPYHDKAREHPDDGKHPDGGLYSKGPSYSSYSGYIMPMNNSDPYMSNGSLSPPIPRTSN  
KVPVQPSHAVHPLTPLITYSDEHFSPGSHPSHIPSDVNSKQGMRSRHPPEIIPAFYPLSPGGVQITPP  
LGWQGQPVYPLTGGLRQPYPSSLSVDTPMSRFSHHMIPGPPGPHTTGIPHPAIVTPQVKQEHPHADSDLM  
HVKPQHEQRKEQEPKRPHIKKPLNAFMLYMKEMRANVVAECTLKESAAINQILGRRWHALSREEQAKYYE  
LARKERQLHMQLYPGWSARDNYGKKKKRKRKREKLQESTSGGKRSSFPTCKAKAATPGPLLEMEAC

# FOXD3

>Python-bivittatus gi|602628796|ref|XP\_007421330.1| PREDICTED: forkhead  
box protein D3 [Python bivittatus]  
MTLSGSLASDMSGQTVLTAEDVDIDVVGEGDEGAEEGGGGPERGAPAAPPAAGWAAAAAPAAAAASSG  
GKPKSSLVKPPYSYIALITMAILQSPQKLTLSGICEFISNRFPPYREKFPWQNSIRHNLSLNDCFKI  
PREPGNPGKGNWTLDPQSEDMFDNGSFLRRRKRFRKHQQEQLREQTALMMHSFGAYSLAAGPAASSAA  
SAQTFLRPPVTAQSGLLAHQPLSLARSTAAIAPILSVPTNILSGQFLQPAASAATVQAKWPAQ

>Homo-sapiens gi|6912372|ref|NP\_036315.1| forkhead box protein D3 [Homo  
sapiens]  
MTLSGGGSASDMSGQTVLTAEDVDIDVVGEGDDGLEEKDS DAGCDSPAGPELRLDEADEVPPAAPHGQ  
PQPPHQPLTLPKEAAGAGAGPGGDVGAPEADGCKGGVGGEEGGASGGGPGAGSGSAGGLAPSKPKNSLV  
KPPYSYIALITMAILQSPQKLTLSGICEFISNRFPPYREKFPWQNSIRHNLSLNDCFKI PREPGNPG  
KGNWTLDPQSEDMFDNGSFLRRRKRFRKHQQEHLREQTALMMQSFAYSLAAAAGAAGPYGRPYGLHPA  
AAAGAYSHPAAAAAAAAAALQYPYALPPVAPVLPVAVPLLPSELGRKAAAFGSQGLPGLQLQLNSLGA  
AAAAAGTAGAAGTTASLIKSEPSARPSFSIENI IGGGPAAPGGS AVGAGVAGGTGGSGGGSTAQSFLRPP  
GTVQSAALMATHQPLSLSRTTATIAPILSVPLSGQFLQPAASAAAAAAAAAQAKWPAQ

>Gallus-gallus gi|45384420|ref|NP\_990282.1| forkhead box protein D3  
[Gallus gallus]  
MTLSGGGSASDMSGQTAALAAEDVDIDVVGEGDDAPGKDGGEARS PAALPLPLDEAAEPGE PERARRAAAA  
RQPGPGRPEGGRGGGGGGGGGEGASGGGAAAAAAGQSKPKSSLVKPPYSYIALITMAILQSPQKLTLS  
SGICEFISNRFPPYREKFPWQNSIRHNLSLNDCFKI PREPGNPGKGNWTLDPQSEDMFDNGSFLRRR  
KRFRKHQQEHLRDTALMMQGFAYGLAGPYGRPYGLPPGAYPHPAALQYPYIPVPGMPLPPACPLPSG  
ELSRKAFNAQLGPSLQLQLSSSLGAAGSIVKSEPSRPSFSIENI IGGPAASSAPSAQTFLRPPVTVQSGL  
VAHQPLALARTTAAIAPILSVPTNIIAGQFLQPPAAVQAKWPAQ

>Canis-familiaris gi|345800141|ref|XP\_003434654.1| PREDICTED: forkhead  
box protein D3 [Canis lupus familiaris]  
MTLSGGGSASDMSGQTVLTAEDVDIDVVGEGDDGLEEKDS DAGCDSPVGPPELRLDEADEVTPAAPLHGQ  
PQPPHQPLALPKEATGAGAGPGGEAGAPEADGCKGGVGGEEGGGSGGGGPGAGGGAAGGLAPSKPKNSL  
VKPPYSYIALITMAILQSPQKLTLSGICEFISNRFPPYREKFPWQNSIRHNLSLNDCFKI PREPGNP  
GKGNWTLDPQSEDMFDNGSFLRRRKRFRKHQQEHLREQTALMMQSFAYSLAAAAGAAGPYGRPYGLHP  
AAAAGAYSHPAAAAAAAAAALQYPYAVPPVAVLPVAVPLLPSELGRKAAAFGSQGLPGLQLQLNSLG  
AAAAAGTAGAAGTTASLIKSEPSAWPSFSIENI IGGGPRGARGLRQRAAGGPGGRADGRDRGPGGGPRR  
PLHSWSARPAPGPAPLPNPGCLLSSISSPPSPTPQHRPSAASTPSRTPRLAEQTRRPPARPPGIAFRTGF  
RKAKE

>Thamnophis-sirtalis gi|927119627|ref|XP\_013931405.1| PREDICTED: forkhead box protein D3 [Thamnophis sirtalis]  
MTLSGNLSANDMSGQTVLTAEDVDIDVVGEEDDCLEDSGSSSSSSSLGGSPVEEKGSEEGSAPGAPSGAAAA  
AGAAAAASSGGKPKSSLVKPPYSYIALITMAILQSPQKKLTLGICEFISNRFPPYYREKFPWQNSIRHN  
LSLNDCFVKIPREPGNPGKGNWTLDPQSEDMFDNGSFLRRRKRFRKRHQEQQLREQTALMMHSFGAYSLA  
AAAAAAAASSSGPYGRAYGLHHGAYPHPAALQYPYIPVGPMLPPAVPLLPSELRSKAFNAQLSPSLQL  
HLSGLGAVTGS GPAAGGVKAEPGRPSFSIENIIGAGAPAVSSSSAVSAQTFLRTPVTAQSGLLAHQPL  
SLARTTAAIAPILSVPTNILSGQLQPAASAGAVQAKWPAQ

>Anolis-carolinensis gi|637293528|ref|XP\_008107538.1| PREDICTED: forkhead box protein D3 [Anolis carolinensis]  
MTLSGSLASDMSGQTVLTAEDVDIDVVGDEGDEAGTEEEARDGAGGLLEGPLPMPLPSQPPCLEEEAPE  
AKQPAGEEGEKGAAGEDGAGSASSSSSSSSSSSSSSAASKPKSSLVKPPYSYIALITMAILQSPQKKLTLG  
ICEFISGRFPYYREKFPWQNSIRHNLSLNDCFVKIPREPGNPGKGNWTLDPQSEDMFDNGSFLRRRKR  
FRKRHQEQQLREQTALMMHSFGAYSLAAAAA AVAGGGGSPYGRAYGAYAHPAAVPYPIPPVGPMLPPAV  
PLLPASGAELSRKAFNAQLGLQLSGLGSGPIKAEPSSRPSFSIENIIGGVGAAAAAAAAAASSSSTPA  
SSSSISQTFLRPPVSVQSSLLAHQPLSLSRSTAAIGPLLSVPTNLLSGQLFPPSAKWPAQ

>Chrysemys-picta-bellii gi|530581942|ref|XP\_005284821.1| PREDICTED:  
forkhead box protein D3 [Chrysemys picta bellii]  
MTLSGSSSTSDMSGQTVLTAEDVDIDVVGEGDEGLEKSDSDEASSPAGLHLEEAEEELLLPKEAGAGGERS  
GGSPAEATPSGAADGGQGRQRKPKNSLVKPPYSYIALITMAILQSPQKKLTLGICEFISNRFPPYYRE  
KFPWQNSIRHNLSLNDCFVKIPREPGNPGKGNWTLDPQSEDMFDNGSFLRRRKRFRKRHQEQHLREQTA  
LMMQSFAYSLASPYGRPYGLHPGAYPHPAALQYPYIPVGPMLPPAVPLLPSELRSKAFNSQLSPS  
LQLQLNSLSAASSLIKSEPSRPSFSIENIIGVSATSSGSSAQTFLRPPVTVQSALMAHQPLSLTRTTAA  
IAPILSVPTNIISGQLQPAASAAAVQAKWPAQ

# POU3F2

>Python-bivittatus gi|602631326|ref|XP\_007422568.1| PREDICTED: POU domain, class 3, transcription factor 2 [Python bivittatus]  
MDGSILAKHAFDLRKASSALSETKRSIWESWVGGSPPPPPHHHHEAHSDEDTPTSDDLQFAKQFKQRR  
IKLGFQTADVGLALGTLYGNVFSQTTICRFEALQLSFKNMCKLPLLNKWLEEADSSSGSPTSIDKIAAQ  
GRKRKRRTSIEVSVKGALESHFLKCPKPSAQEITSLADSLQLEKEVVRVWFCNRRQKEKRMTPPGGALPG  
AEDVYGASRDTPPHHGVTQTPVQ

>Alligator-sinensis gi|557270480|ref|XP\_006020515.1| PREDICTED: POU domain, class 3, transcription factor 2, partial [Alligator sinensis]  
HAHHPHEPHSDEDTPTSDDLQFAKQFKQRRIKLGFQTADVGLALGTLYGNVFSQTTICRFEALQLSFKN  
MCKLPLLNKWLEEADSSSGSPTSIDKIAAQGRKRKRRTSIEVSVKGALESHFLKCPKPSAQEITSLADS  
LQLEKEVVRVWFCNRRQKEKRMTPPGGTLPGAEDVYGASRDTPPHHGVTQTPVQ

>Canis-familiaris gi|928150842|ref|XP\_013973738.1| PREDICTED: POU domain, class 3, transcription factor 2 [Canis lupus familiaris]  
MQDQERSNGGGDGSPWSTSPGQPDIKPSVVVQGGRGDELHGPALQQQHQQQQQQQQQQQQQQQQ  
QQQRPPHLVHHAANHHHPGPAWRSAAAAAHLPPSMGASNGGLLYSQPSFTVNGMLGAGGQPAGLHHHGLR  
DAHDEPHHADHHPHSHPHQPPPPPPPPQPPGHPGAHHDPHSDEDTPTSDDLQFAKQFKQRRIKLGF  
TQADVGLALGTLYGNVFSQTTICRFEALQLSFKNMCKLPLLNKWLEEADSSSGSPTSIDKIAAQGRKRK  
RRTSIEVSVKGALESHFLKCPKPSAQEITSLADSLQLEKEVVRVWFCNRRQKEKRMTPPGGTLPGAEDVY  
GSRDTPPHHGVTQTPVQ

>Thamnophis-sirtalis gi|927123025|ref|XP\_013907311.1| PREDICTED: POU domain, class 3, transcription factor 2 [Thamnophis sirtalis]  
MATTASNHYSLLTSSSPMVHAEPGSMQPGAGYRDAQALVQADYALQSNHGPLSHAHQWITALSHGGGGG  
GGGGGGGGGGGGGGGGGGGDSFWSPPLGQQDIKPSVVQAGGRGDELQQQQQHHQOSQQQGRPPHLVHHAGS  
HHA AVAAVAWRTGSSAHLPPGMAAANGGGQGGLLYAQPPGFTVNGMLGSGQPGMHHSRDAHEEPPPP  
PQQQQQQQQPPPHHPDHLAQQQQQQQQPHHHHPHGGPPPPPPPHHHHHEAHSDEDTPTSDDLEQFAKQFK  
QRRIKLGFTQADVGLALGTLYGNVFSQTTICRFEALQLSFKNMCKLKPLLKNWLEEADSSSGSPTSIDKI  
AAQGRKRKRRTSIEVSVKGALESHFLKCPKPSAQEITSLADSLQLEKEVVRVWFCNRRQKEKRMTPPGGA  
LPGAEDVYGASRDTPPHHGVQTPVQ

>Anolis-carolinensis gi|637253021|ref|XP\_003215570.2| PREDICTED: POU domain, class 3, transcription factor 2 [Anolis carolinensis]  
MATTASNHYSLLAASSPMVHAEPGSMQPGAGYRDAVQADYAALQSNHGPLSHAHQWIAALSHGGGGGGG  
GGGGGGGGGGGGGGGGGGSSGGDSPWSTSPDIKPSVPPPPPPPPPPPHHPDHLVQQQQQQQQHHAPPPPH  
HHHPHHPAHPHHEAHSDEDTPTSDDLEQFAKQFKQRRIKLGFTQADVGLALGTLYGNVFSQTTICRFE  
ALQLSFKNMCKLKPLLKNWLEEADSSSGSPTSIDKIAAQGRKRKRRTSIEVSVKGALESHFLKCPKPSAQ  
EITSLADSLQLEKEVVRVWFCNRRQKEKRMTPPGGTLPGAEDVYGASRDTPPHHGEQDWGDALPLPSNH  
PLTLLQSL

>Mus-musculus gi|6679423|ref|NP\_032925.1| POU domain, class 3, transcription factor 2 [Mus musculus]  
MATAASNHYSLLTSSASIVHAEPGGMQQGAGGYREAQSLVQGDYALQSNHGPLSHAHQWITALSHGGG  
GGGGGGGGGGGGGGGGGGDGSFWSTSPDGQPDIKPSVVVQQGGRGDELHGPGALQQQHQQQQQQQQQQQ  
QQQQQQQQQQRPPHLVHHAANHHPPGAWRSAAAAAHLPPSMGASNGGLLYSQPSFTVNGMLGAGGQPA  
GLHHHGLRDAHDEPHHADHHPHSHPHQPPPPPPQGGPHGPAHHDPHSDEDTPTSDDLEQFAKQFK  
QRRIKLGFTQADVGLALGTLYGNVFSQTTICRFEALQLSFKNMCKLKPLLKNWLEEADSSSGSPTSIDKI  
AAQGRKRKRRTSIEVSVKGALESHFLKCPKPSAQEITSLADSLQLEKEVVRVWFCNRRQKEKRMTPPGGT  
LPGAEDVYGGSRDTPPHHGVQTPVQ

>Ophiophagus-hannah\_PARTIAL gi|565323504|gb|ETE74074.1| POU domain, class 3, transcription factor 2, partial [Ophiophagus hannah]  
FAKQFKQRRIKLGFTQADVGLALGTLYGNVFSQTTICRFEALQLSFKNMCKLKPLLKNWLEEADSSSGSP  
TSIDKIAAQGRKRKRRTSIEVSVKGALESHFLKCPKPSAQEITSLADSLQLEKEVVRVWFCNRRQKEKRM  
TPGGALPGAEDVYGASRDTPPHHGEAGGRGGRAQASSL

>Homo-sapiens gi|119568876|gb|EAW48491.1| POU domain, class 3, transcription factor 2 [Homo sapiens]  
MATAASNHYSLLTSSASIVHAEPGGMQQGAGGYREAQSLVQGDYALQSNHGPLSHAHQWITALSHGGG  
GGGGGGGGGGGGGGGGGGDGSFWSTSPDGQPDIKPSVVVQQGGRGDELHGPGALQQQHQQQQQQQQQQQ  
QQQQQQQQQQRPPHLVHHAANHHPPGAWRSAAAAAHLPPSMGASNGGLLYSQPSFTVNGMLGAGGQPAGL  
HHHGLRDAHDEPHHADHHPHSHPHQPPPPPPQGGPHGPAHHDPHSDEDTPTSDDLEQFAKQFKQR  
RIKLGFTQADVGLALGTLYGNVFSQTTICRFEALQLSFKNMCKLKPLLKNWLEEADSSSGSPTSIDKIAA  
QGRKRKRRTSIEVSVKGALESHFLKCPKPSAQEITSLADSLQLEKEVVRVWFCNRRQKEKRMTPPGGTLP  
GAEDVYGGSRDTPPHHGVQTPVQ

# MITF

>Python-bivittatus gi|602653814|ref|XP\_007432759.1| PREDICTED:  
microphthalmia-associated transcription factor-like isoform X1 [Python  
bivittatus]  
MTRILLRQQLMREQMQEQERREQRQKQQAQFMQQRGAVSQTTPAINVSLPTSPPATQVPMEVLKVQTH  
LENPTKYHIQQAQRQOVKQYLSTTLANKHNNQALSLPCPNQPSDHVMPPGTGSSAPNSPMAMLTLSNCE  
KEGFYKFEEQSNRAENECRTLNTHSRVSCMQMDDVIDDIISLESSYNEEIFGLMDPALQIANTLPVSGNL  
VDLYGNQGLPPPGLNISNSCPANLPNIKRELTGLGRLASQPSGEDFEGAGYTGVEHEKGGISSFPVLLMEN  
ILTDGGLTECSPLSSESEARALAKERQKKDNHNLIERRRRFNINDRIKELGTLPKSNPDMRWKGTIL  
KASVDYIRKLQREQQRTKELENRQKKLEHANRHLLLRIQELEMQARAHGLSIIIPSTGLCSPMVNRLIKQ  
EPILDNCSQEILQQHHPELSSTTTLDLTDGTITFNGLANVTESAPSTYAVPTKMGSKLEDMLMDDTSLP  
AGVTDPLLSSVSPGASKTSSRRSSVSMEDTDHAC

>Canis-familiaris gi|50979188|ref|NP\_001003337.1| microphthalmia-  
associated transcription factor [Canis lupus familiaris]  
MLEMLEYNHVQVQTHLENPTKYHIQQAQRQOVKQYLSTTLANKHANQVLSLPCPNQPGDHVMPPVPGSSA  
PNSPMAMLTLSNCEKEGFYKFEEQNRAESECPMTNTHSRASCMQMDDVIDDIISLESSYNEEILGLMDP  
ALQMANLTPVSGNLIDLYGNQGLPPPGLTISNSCPANLPNIKRELTACIFPTESEARALAKERQKKDNH  
LIERRRRFNINDRIKELGTLPKSNPDMRWKGTILKASVDYIRKLQREQQRAKELENRQKKLEHANRH  
LLLRIQELEMQARAHGLSLIPSTGLCSPDLVNRIKQEPTELENCNQLLQHHADLPCTTTLDLTDGSI  
TFNNLGGAGTESSQAYSVPKMGSKLEDIILMDDTSLPVGVTDPLLSSVSPGASKTSSRRSSMSMEETDHAC

>Equus-caballus gi|255522885|ref|NP\_001157346.1| microphthalmia-  
associated transcription factor [Equus caballus]  
MGHVENTSVVFPRAIFSTWEKETMELTCLSLRSSEEHGASKPPISSSSMTSRILLRQQLMREQMQEQ  
ERREQQQKLQAAQFMQQRVVSQTTPAINVSVPTTLPSATQVPMEVLKVQTHLENPTKYHIQQAQRQOVKQ  
YLSTTLANKHANQVLSLPCPNQPGDHVMPPVPGSSAPNSPMAMLTLSNCEKEGFYKFEEQNRAESECP  
MNTHSRASCQMQMDDVIDDIISLESSYNEEILGLMDPALQMANLTPVSGNLIDLYSNQGLPPPGLTISNS  
CPANLPNIKRELTSEARALAKERQKKDNHNLIERRRRFNINDRIKELGTLPKSNPDMRWKGTILKAS  
VDYIRKLQREQQRAKELENRQKKLEHANRHLLLRIQELEMQARAHGLSLIPSTGLCSPDLVNRIKQEP  
ALENCNQLLQHHADLTCTTTLDLTDGTISFNNNLGTGTESNQAYSIPAKMGSKLEDIILMDDTSLPVGV  
TDPLLSSVSPGASKTSSRRSSMSMEETEAC

>Ophiophagus-hannah\_PARTIAL gi|565313510|gb|ETE65831.1| Microphthalmia-  
associated transcription factor, partial [Ophiophagus hannah]  
MTRILLRQQLMREQMQEQERREQRQKQQAQFMQQRGAVSQTTPAINVSLPASLPPATQVPMEVLKVQTH  
LENPTKYHIQQAQRQOVKQYLSTTLANKHNNQALSLPCPNQPVDMVMPPGTGSSAPNSPMAMLTLSNCE  
KEGFYKFEEQSNRAENECQSLNTHPRVSCMQMDDVIDDIISLESSYNEEIFGLMDPALQIANTLPVSGNL  
VDLYGNQGLPPPGLNISNSCPANLPNIKRELTGYTLYLPPTKVEAGIFARYVSQSIYEVECSREISKFTL  
QLLPFNIIILNLTSLTCSISYVFPPIESEARALAKERQKKDNHNLIERRRRFNINDRIKELGTLPKSNP  
DMRWKGTILKASVDYIRKLQREQQRTKELENRQKKLEHANRHLLLRIQVC

>Gallus-gallus gi|46048817|ref|NP\_990360.1| microphthalmia-associated  
transcription factor [Gallus gallus]  
MTRILLRQQLMREQMQEQERREQQKQQAQFMQQRVVSQTTPAINVSVPASLPPATQVPMEVLKVQTH  
LENPTKYHIQQAQRQOVKQYLSTTLANKHANQALSLPCPNQPGDHVMPPGTGSSAPNSPMAMLTLSNCE  
KEGFYKFEEQSRVESECPALNTHSRASCQMQMDDVIDDIISLESSYNEEILGLMDPALQMANLTPVSGNL  
IDLYGNQSMPPPGLNISNSCPANLPNIKRELTSEARALAKERQKKDNHNLIERRRRFNINDRIKELGTLP  
KSNPDMRWKGTILKASVDYIRKLQREQQRTKELENRQKKLEHANRHLLLRIQELEMQARAHGLSLVP  
STGICSPDMVNRVIKQEPVLDNLCNQLMPHHTDLSTTTLDLTDGTITFSDNLGNVTEPTGTYSVPKMG  
SKLEDIILMDDTSLPVGVTDPLLSSVSPGASKTSSRRSSVSMEDTDHAC

>Mus-musculus gi|148666943|gb|EDK99359.1| microphthalmia-associated transcription factor [Mus musculus]  
MLEMLEYSHYQVQTHLENPTKYHIQQAQRHQVKQYLSTTLANKHASQVLSSPCPNQPGDHAMPPVPGSSA  
PNSPMAMLTLLNSNCEKEAFYKFEEQSRAESECPCGMNTHSRASCMQMDVIDDIISLESSYNEEILGLMDP  
ALQMANTLPVSGNLIDLYSNQGLPPPGLTISNSCPANLPNIKRELTACIFPTESEARALAKERQKKDNHN  
LIERRRRFNINDRIKELGTLPKSNPDMRWKGTILKASVDYIRKLQREQQRAKDLENRQKKLEHANRH  
LLLRVQELEMQARAHGLSLIPSTGLCSPDLVNRIKQEPVLENCSEQELVQHQADLTCTTTLDLTDGTITF  
TNNLGTMPESPAYSIPRKMGSNLEDILMDDALSPVGVTDPLLSSVSPGASKTSSRRSSMSAEETEHC

>Gallus-gallus gi|725825443|gb|AIY34493.1| microphthalmia-associated transcription factor [Gallus gallus]  
MTRILLRQQLMREMQEQERREQQQKQAAQFMQQRVPVSQTPAINVSVPASLPPATQVPMEVLKVQTH  
LENPTKYHIQQAQRQVKQYLSTTLANKHANQALSPLCPNPGDHVMPPGTGSSAPNSPMAMLTLLNSNCE  
KEGFYKFEEQSRVESECPALNTHSRASCMQMDVIDDIISLESSYNEEILGLMDPALQMANTLPVSGNLI  
DLYGNQSMPPPGLNISNSCPANLPNIKRELTESEARALAKERQKKDNHNLIERRRRFNINDRIKELGTLP  
KSNPDMRWKGTILKASVDYIRKLQREQQRTKELENRQKKLEHANRHLLLRIQELEMQARAHGLSLVP  
STGICSPDMVNRVIKQEPVLDNCNQDLMPHHTDLSTTTLDLTDGTITFSDNLGNVTEPTGTYSVPAKMG  
SKLEDILMDDTLSPVGVTDPLLSSVSPGASKTSSRRSSVSMEDTDHAC

>Alligator-mississippiensis gi|564263951|ref|XP\_006270831.1| PREDICTED:  
microphthalmia-associated transcription factor isoform X1 [Alligator mississippiensis]  
MTRILLRQQLMREMQEQERREQQQKQAAQFMQQRVPVSQTPAINVSVPSLPPATQVPMEVLKVQTH  
LENPTKYHIQQAQRQVKQYLSTTLANKHANQALSPLCPNPGDHVMPSGTGSSAPNSPMAMLTLLNSNCE  
KEGLYKFEEQSRLESECPALNTHSRRTSCMQMDVIDDIISLESSYSEEILGLMDPALQMANTLPVSGNLI  
DLYGNHTSMPPPGLNISNSCPANLPNIKRELTACIFPTESEARALAKERQKKDNHNLIERRRRFNINDRIK  
ELGTLPKSNPDMRWKGTILKASVDYIRKLQREQQRTKELENRQKKLEHANRHLLLRIQELEMQARAH  
GLSLVPSTGLCSPDVNRVIKQESVIDNCNPDIVQHRDLSCTTTLDLTDGTITFSDNLGNVTDSSAYSV  
PTKMGSKLEDILMDDTLSPVGVTDPLLSSVSPGASKTSSRRSSVSMEDTDHTC

>Chrysemys-picta-bellii gi|641792697|ref|XP\_008177703.1| PREDICTED:  
microphthalmia-associated transcription factor isoform X1 [Chrysemys picta bellii]  
MLNNLPRTLWEQVSMQKQKEVEKFSFAFSPKIGLLEHASFWAALSCGARNKTESSSSYGSSSLSVKHRPRWG  
PEPSLGFQGAIAVQIHNDSDGKTLTYQVQLQILSSSEHPGASKPPLSSSSMTRILLRQQLMREMQEQE  
RREQQQKQAAQFMQQRVPLSQTTPAINVSVPSNLPPPTQVPMEVLKVQTHLENPTKYHIQQAQRQVKQY  
LSTTLANKHTNQALSPLCPNPGDHVMPPGTGSSAPNSPMAMLTLLNSNCEKEGFYKFEEQSRVESECPAL  
NTHTRASCMQMDVIDDIISLESSYNEEILGLMDPALQMANTLPVSGNLIDLYGNQGMPPSGLNVNSCP  
ANLPNIKRELTACIFPTESEARALAKERQKKDNHNLIERRRRFNINDRIKELGTLPKSNPDMRWKGT  
ILKASVDYIRKLQREQQRTKELENRQKKLEHANRHLLLRIQELEMQARAHGLSLVPSTGLCSPDVNRVI  
KQEPVIDNCNQDVLQHRSDLSCTTTLDLTDGTITFNDNLGTYSVPTKAGSKLEDILMDDTLSPVGVTDPL  
LSSVSPGASKTSSRRSSVSMEDTDHAC

# LEF-1  
>Python-bivittatus gi|602628890|ref|XP\_007421376.1| PREDICTED: lymphoid enhancer-binding factor 1 [Python bivittatus]  
MPQLSGGGGPELPCATDEMIPFKDEGDPQKETIFAEISHPEEEGDLADIKSSLVNESETIPNSNGHGHEV  
SRPGQSQEAYEKGREHPEEGKHTDGVLYNKGPSYSGYSYIMPMNNDPYMSNGSLSPPIPRTSNKVPP

VQPSHAVHPLTPLITYSDEHFSPGTHPSHLPDSDVNTKQGMTRHPPGPDLDSTFYPLSPGSGVQITPPLGWQ  
GQPVYISGGFRQPFSSLSVDTSMSRFSHHMIPGPPGPHTTGIPHPAIVTPQVKQEHPTDSDLMHVKP  
QHEQRKEQEPKRPHIKKPLNAFMLYMKEMRANVVAECTLKESAAINQILGRRWHALSREEQAKYYELARK  
ERQLHMQLYPGWSARDNYGKKKKRREKLQESTSGTAPRMTAAYI

>Mus-musculus gi|27735019|ref|NP\_034833.2| lymphoid enhancer-binding  
factor 1 isoform a [Mus musculus]  
MPQLSGGGGGGDPPELCADEMIPFKDEGDPQKEKIFAEISHPEEEGDLADIKSSLVNESEIIPASNGHEV  
VRQAPSSQEPYHDKAREHPDEGKHPDGGLYNKGPSYSSYSGYIMPMNNSDPYMSNGSLSPPIPRTSNKV  
PVVQPSHAVHPLTPLITYSDEHFSPGSHPSHIPSDVNSKQGMRSRHPAPEIPTFYPLSPGGVGQITPPIG  
WQGQPVYIPITGGFRQPYSSLSGDTSMSRFSHHMIPGPPGPHTTGIPHPAIVTPQVKQEHPTDSDLMHV  
KPQHEQRKEQEPKRPHIKKPLNAFMLYMKEMRANVVAECTLKESAAINQILGRRWHALSREEQAKYYELA  
RKERQLHMQLYPGWSARDNYGKKKKRREKLQESTSGTGPRMTAAYI

>Ophiophagus-hannah\_PARTIAL gi|565315274|gb|ETE67199.1| Lymphoid  
enhancer-binding factor 1, partial [Ophiophagus hannah]  
MARCEHQYSVFDTRARFTVYAAQALDIRSSNKVPVQPSHAVHPLTPLITYSDEHFSPGTHPSHLPDSDV  
STKQGMNRHPPGPDISTFYPLSPGSGVQITPPLGWQGPVYPISSGFRHPYSSLSVDTSMSRFSHHMIP  
GPPGPHTTGIPHPAIVTPQVKQEHPTDSDLMHVKPQHEQRKEQEPKRPHIKKPLNAFMLYMKEMRANWH  
ALSREEQAKYYELARKERQLHMQLYPGWSARDNYSSSLILFFHFPELPI SLHEKYLNAMKSANLGSVAG  
LYCAGNTTVTELYLGRWYGFYYLPVFFHFIYGGKKFLNFMSLPYENSLELEI

>Gallus-gallus gi|45384346|ref|NP\_990344.1| lymphoid enhancer-binding  
factor 1 [Gallus gallus]  
MPQLPGAGGGGGDPPELCADEMIPFKDEGDPQKEKIFAEISHPEEEGDLADIKSSLVNESEIAPGSGGHE  
VSRQTPAQDSYHDKGREHPEEGKHPDGGLYSKGPSYSSYSGYIMPMNNDPYPMPNGSLSPPIPRTSNKV  
PVVQPSHAVHPLTPLITYSDEHFSPGSHPSHIPSDVSSKQGMRSRHPAPDIPTFYPLSPGGVGQITPPLG  
WFSHHMIPGPPGPHTTGIPHPAIVTPQVKQEHPHNDSELMHVVKPQHEQRKEQEPKRPHIKKPLNAFMLY  
KEMRANVVAECTLKESAAINQILGRRWHALSREEQAKYYELARKERQLHMQLYPGWSARDNYGKKKKRKR  
EKLQESASGTGPRMTAAYI

>Homo-sapiens gi|29792286|gb|AAH50632.1| Lymphoid enhancer-binding factor  
1 [Homo sapiens]  
MPQLSGGGGGGGDPPELCADEMIPFKDEGDPQKEKIFAEISHPEEEGDLADIKSSLVNESEIIPASNGH  
EVARQAQTSQEPYHDKAREHPDDGKHPDGGLYNKGPSYSSYSGYIMPMNNDPYPMSNGSLSPPIPRTSN  
KVPVVQPSHAVHPLTPLITYSDEHFSPGSHPSHIPSDVNSKQGMRSRHPAPDIPTFYPLSPGGVGQITPP  
LGWQGQPVYIPITGGFRQPYSSLSVDTSMSRFSHHMIPGPPGPHTTGIPHPAIVTPQVKQEHPTDSDLM  
HVVKPQHEQRKEQEPKRPHIKKPLNAFMLYMKEMRANVVAECTLKESAAINQILGRRWHALSREEQAKYYE  
LARKERQLHMQLYPGWSARDNYGKKKKRREKLQESASGTGPRMTAAYI

> Alligator-sinensis gi|557297798|ref|XP\_006031200.1| PREDICTED: lymphoid  
enhancer-binding factor 1 isoform X1 [Alligator sinensis]  
MMPNMNDPYPMSNGSLSPPIPRTSNKVPVVQPSHAVHPLTPLITYSDEHFSPGSHPSHMPDSDVNSKQGM  
RHPPAPDIPTFYPLSPGGVGQITPPLGWQGPVYPISSGFRQPYSSLSVDPSMSRFSHHMIPGPPGPHT  
TGIPHPAIVTPQVKQEHPHNDSELMHVVKPQHEQRKEQEPKRPHIKKPLNAFMLYMKEMRANVVAECTLKE  
SAAINQILGRRWHALSREEQAKYYELARKERQLHMQLYPGWSARDNYGKKKKRREKLQESASGGKRNFT  
STCKTKAATPGPLLEMEAC

>Canis-familiaris gi|74002121|ref|XP\_863402.1| PREDICTED: lymphoid  
enhancer-binding factor 1 isoform X3 [Canis lupus familiaris]  
MPQLSGAGGGGGGGDPPELCADEMIPFKDEGDPQKEKIFAEISHPEEEGDLADIKSSLVNESEIIPTSNG  
HEVARQAQTSQESYHDKAREHPDDGKHPDGGLYNKGPSYSSYSGYIMPMNNDPYPMSNGSLSPPIPRTS

NKVPVVQPSHAVHPLTPLITYSDEHFSPGSHPSHLPDVNSKQGMSRHPPAPEIPTFYPLSPGGVGQITP  
PLGWFSHHMIPGPPGPHTTGIPHPAIVTPQVKQEHPTDSDLMHVVKPQHEQRKEQEPKRPHIKKPLNAFM  
LYMKEMRANVVAECTLKESAAINQILGRRWHALSREEQAKYYELARKERQLHMQLYPGWSARDNYGKKK  
RKREKLQESTSGGKRNSFPTCKAKAATPGPILLEMEAC

>Thamnophis-sirtalis gi|927194465|ref|XP\_013930427.1| PREDICTED: lymphoid  
enhancer-binding factor 1 isoform X1 [Thamnophis sirtalis]  
MPQLSGGGGGPELPCATDEMIPFKDEGDPQKETIFAEISHPEEEGDLADIKSSLVNESETIPSSNGHEVSR  
QGQSQEVYEKSREHPPEGKHIDGVLYNKGPSYSGYIMPMNMNDPYMSNGSLSPPIPRTSNKVPVVQP  
SHAVHPLTPLITYSDEHFSPGTHPSHLPDVNTKQGMNRHPPGPDISTFYPLSPGSGVQITPPLGWFSHH  
MIPGPPGPHTTGIPHPAIVTPQVKQEHPTDSDLMHVVKPQHEQRKEQEPKRPHIKKPLNAFM  
LYMKEMRANVVAECTLKESAAINQILGRRWHALSREEQAKYYELARKERQLHMQLYPGWSARDNYGKKK  
RKREKLQESTSGIFMGTAPRMTAAYI

> Anolis-carolinensis gi|327283645|ref|XP\_003226551.1| PREDICTED:  
lymphoid enhancer-binding factor 1 isoform X2 [Anolis carolinensis]  
MPQLSGGGGGGGGGGGGGDPELPCATDEMIPFKDEGDPQKEKIFAEISHPEEEGDLADIKSSLVNESETIS  
SSNGHEVSRQGQPQEIYHDKGREHPPEGKHTDGGLYKGPSYSGYIMPMNMNDPYMSNGSLSPPIPR  
RTSNKVVPVVQPSHAVHPLTPLITYSDEHFSPGTHPSHLPDVNSKQGMSRHPPGPDMPFTFYPLSPG  
SVGQITPPLGWQGPVYPISSGFRQYPSSLSVDTSMSRFSHHMIPGPPGPHTTGIPHPAIVTPQVKQ  
EHPTDSDLMHVVKPQHEQRKEQEPKRPHIKKPLNAFM  
LYMKEMRANVVAECTLKESAAINQILGRRWHALSREEQAKYYELARKERQLHMQLYPGWSARDNYG  
KKKRRKREKLQESTSGAAPRMTAAYI

>Equus-caballus gi|545210283|ref|XP\_005607957.1| PREDICTED: lymphoid  
enhancer-binding factor 1 isoform X3 [Equus caballus]  
MVARQAQTSQEPYHDKAREHPDDGKHPDGGLYSKGPSYSSYSGYIMPMNMNSDPYMSNGSLSPPIPR  
TSNKVPVVQPSHAVHPLTPLITYSDEHFSPGSHPSHLPDVNSKQGMSRHPPAPEIPAFYPLSPGGVG  
QITPPLGWQGPVYPLTGGLRQYPSSLSVDTMPSRFSHHMIPGPPGPHTTGIPHPAIVTPQVKQEH  
PHADSDLMHVVKPQHEQRKEQEPKRPHIKKPLNAFM  
LYMKEMRANVVAECTLKESAAINQILGRRWHALSREEQAKYYELARKERQLHMQLYPGWSARDNYG  
KKKRRKREKLQESTSGGKRSSFPTCKAKAATPGPILLEMEAC
